# Supplementary material for: Exosomal microRNAs in seminal plasma are markers of the origin of azoospermia and can predict the presence of sperm in testicular tissue
Source: PubMed Central journal article supplement — Hum Reprod. 2018 Apr 4;33(6):1087–98. doi: 10.1093/humrep/dey072 (PMC5972609; doi:10.1093/humrep/dey072), 2018-04-04
Supplement: dey072suppl_figure1.pdf [file dey072suppl_figure1.pdf]

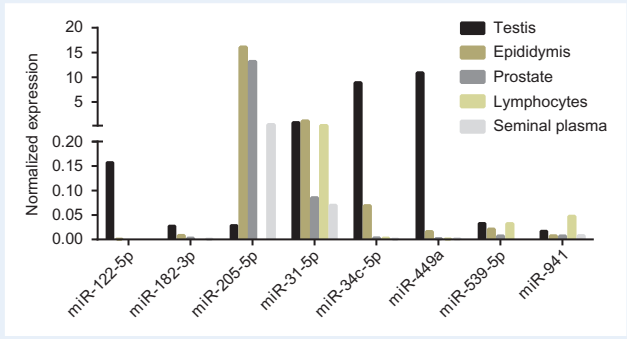

**Supplementary Figure S1** Tissue expression profiling of the eight candidate miRNAs. miRNA expression was determined by RT-qPCR in several reproductive organs such as testis, epididymis and prostate, as well as in exosomes from seminal plasma and lymphocytes. Expression levels relative to miR-30d-5p and miR-30e-3p are shown.
