# Supplementary material for: Exosomal microRNAs in seminal plasma are markers of the origin of azoospermia and can predict the presence of sperm in testicular tissue
Source: PubMed Central journal article supplement — Hum Reprod. 2018 Apr 4;33(6):1087–98. doi: 10.1093/humrep/dey072 (PMC5972609; doi:10.1093/humrep/dey072), 2018-04-04
Supplement: dey072suppl_figure2.pdf [file dey072suppl_figure2.pdf]

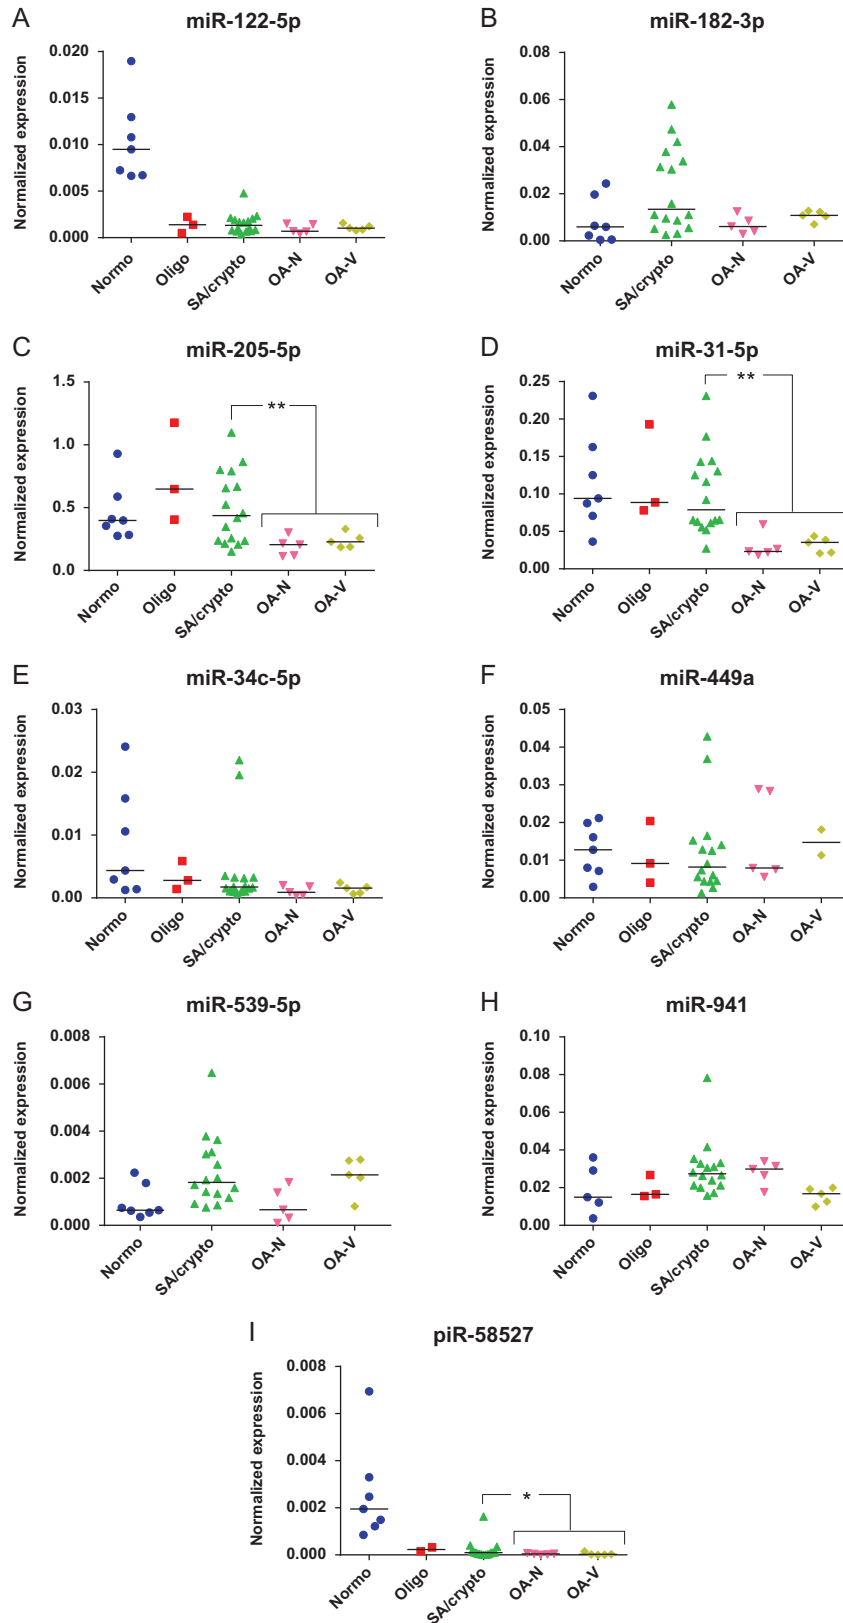

**Supplementary Figure S2** Exosome miRNA levels in seminal plasma are altered in azoospermia with different origins. Expression profiling, at the validating stage, of the miRNAs/piRNA in exosomes from semen. Normo, normozoospermic men; Oligo, oligozoospermic men; SA/crypto, men with azoospermia/cryptozoospermia; OA-V, obstructive azoospermia from men successfully vasectomized; OA-N, individuals presenting a pathological naturally occurring obstruction in the genital tract. The horizontal bar displays the median cellular expression level. Significant differences between groups are indicated: \* $P < 0.05$ ; \*\* $P < 0.01$  (Mann Whitney  $U$  test).
