# Supplementary material for: Exosomal microRNAs in seminal plasma are markers of the origin of azoospermia and can predict the presence of sperm in testicular tissue
Source: PubMed Central journal article supplement — Hum Reprod. 2018 Apr 4;33(6):1087–98. doi: 10.1093/humrep/dey072 (PMC5972609; doi:10.1093/humrep/dey072), 2018-04-04
Supplement: dey072suppl_table1.pdf [file dey072suppl_table1.pdf]

**Supplementary Table S1 Nanoparticle tracking analysis of semen vesicles using a Nanosight device.**

| <b>A.</b>      |               |                |               |
|----------------|---------------|----------------|---------------|
|                | <b>Nz</b>     | <b>SA</b>      | <b>OA</b>     |
| Size mean (nm) | 128 ± 5.20    | 128.57 ± 5.14  | 128 ± 1.18    |
| Size mode (nm) | 100.57 ± 2.94 | 101.82 ± 4.85  | 108.8 ± 6.35  |
| Size D10 (nm)  | 77.23 ± 3.27  | 77.28 ± 3.36   | 77.4 ± 1.66   |
| Size D50 (nm)  | 105.57 ± 3.65 | 106.78 ± 3.60  | 107.87 ± 1.29 |
| Size D90 (nm)  | 169.4 ± 13.31 | 175.12 ± 19.70 | 169.2 ± 6.89  |

  

| <b>B.</b>              |                             |                     |                     |
|------------------------|-----------------------------|---------------------|---------------------|
| <b>Bin centre (nm)</b> | <b>Percentile undersize</b> |                     |                     |
|                        | <b>Nz (%)</b>               | <b>SA (%)</b>       | <b>OA (%)</b>       |
| 5                      | 0 ± 0                       | 0 ± 0               | 0 ± 0               |
| 15                     | 0 ± 0                       | 1.59E-09 ± 3.89E-09 | 0 ± 0               |
| 25                     | 3.67E-10 ± 6.36E-10         | 1E-3 ± 3E-3         | 2.52E-06 ± 4.37E-06 |
| 35                     | 1E-3 ± 2E-3                 | 0.01 ± 0.02         | 2E-4 ± 4E-4         |
| 45                     | 2E-3 ± 3E-3                 | 0.03 ± 0.03         | 3E-4 ± 5E-4         |
| 55                     | 0.01 ± 0.01                 | 0.06 ± 0.07         | 1E-3 ± 5E-4         |
| 65                     | 0.43 ± 0.36                 | 0.76 ± 0.43         | 0.16 ± 0.10         |
| 75                     | 3.55 ± 1.26                 | 4.01 ± 1.97         | 3.04 ± 1.19         |
| 85                     | 13.71 ± 4.69                | 13.26 ± 4.72        | 12.15 ± 0.75        |
| 95                     | 27.80 ± 4.94                | 27.22 ± 5.86        | 26.13 ± 1.63        |
| 105                    | 43.53 ± 3.32                | 41.80 ± 5.25        | 39.05 ± 1.24        |
| 115                    | 55.79 ± 4.39                | 54.81 ± 4.85        | 52.93 ± 2.05        |
| 125                    | 64.58 ± 5.50                | 64.63 ± 4.77        | 64.58 ± 1.94        |
| 135                    | 72.02 ± 5.13                | 71.64 ± 4.49        | 72.60 ± 1.90        |
| 145                    | 79.11 ± 4.18                | 77.84 ± 3.23        | 78.66 ± 2.06        |
| 155                    | 84.72 ± 3.18                | 83.22 ± 2.27        | 83.55 ± 1.89        |
| 165                    | 88.44 ± 2.39                | 87.02 ± 2.53        | 87.44 ± 1.56        |
| 175                    | 90.88 ± 2.37                | 89.78 ± 3.13        | 90.30 ± 1.57        |
| 185                    | 92.59 ± 2.59                | 91.76 ± 3.46        | 92.38 ± 1.32        |
| 195                    | 93.82 ± 2.58                | 93.22 ± 3.51        | 93.74 ± 1.08        |
| 205                    | 94.72 ± 2.28                | 94.35 ± 3.46        | 94.91 ± 0.78        |
| 215                    | 95.45 ± 1.75                | 95.24 ± 3.29        | 96.25 ± 0.43        |
| 225                    | 96.03 ± 1.14                | 96.03 ± 2.97        | 97.04 ± 0.30        |
| 235                    | 96.48 ± 0.76                | 96.75 ± 2.55        | 97.62 ± 0.43        |
| 245                    | 96.86 ± 0.68                | 97.43 ± 2.13        | 98.08 ± 0.55        |
| 255                    | 97.28 ± 0.72                | 98.00 ± 1.77        | 98.41 ± 0.57        |
| 265                    | 97.72 ± 0.82                | 98.40 ± 1.51        | 98.64 ± 0.55        |
| 275                    | 98.07 ± 0.89                | 98.67 ± 1.36        | 98.83 ± 0.48        |
| 285                    | 98.28 ± 0.89                | 98.85 ± 1.26        | 98.99 ± 0.39        |
| 295                    | 98.42 ± 0.86                | 98.99 ± 1.18        | 99.10 ± 0.32        |
| 305                    | 98.53 ± 0.82                | 99.12 ± 1.11        | 99.28 ± 0.21        |

Continued

**Supplementary Table S1 Continued**

| <b>B.</b>              |                             |               |               |
|------------------------|-----------------------------|---------------|---------------|
| <b>Bin centre (nm)</b> | <b>Percentile undersize</b> |               |               |
|                        | <b>Nz (%)</b>               | <b>SA (%)</b> | <b>OA (%)</b> |
| 315                    | 98.65 ± 0.78                | 99.21 ± 1.06  | 99.42 ± 0.08  |
| 325                    | 98.79 ± 0.74                | 99.25 ± 1.01  | 99.51 ± 0.06  |
| 335                    | 98.93 ± 0.68                | 99.28 ± 0.96  | 99.57 ± 0.11  |
| 345                    | 99.10 ± 0.56                | 99.31 ± 0.90  | 99.62 ± 0.13  |
| 355                    | 99.29 ± 0.37                | 99.35 ± 0.83  | 99.65 ± 0.14  |
| 365                    | 99.47 ± 0.19                | 99.40 ± 0.75  | 99.71 ± 0.17  |
| 375                    | 99.58 ± 0.10                | 99.46 ± 0.68  | 99.75 ± 0.22  |
| 385                    | 99.67 ± 0.07                | 99.55 ± 0.62  | 99.78 ± 0.23  |
| 395                    | 99.73 ± 0.11                | 99.63 ± 0.58  | 99.80 ± 0.23  |
| 405                    | 99.77 ± 0.14                | 99.69 ± 0.54  | 99.84 ± 0.19  |
| 415                    | 99.80 ± 0.15                | 99.73 ± 0.51  | 99.90 ± 0.09  |
| 425                    | 99.83 ± 0.14                | 99.77 ± 0.46  | 99.95 ± 0.03  |
| 435                    | 99.87 ± 0.10                | 99.80 ± 0.41  | 99.97 ± 0.04  |
| 445                    | 99.92 ± 0.05                | 99.84 ± 0.34  | 99.97 ± 0.04  |
| 455                    | 99.96 ± 0.02                | 99.88 ± 0.27  | 99.97 ± 0.04  |
| 465                    | 99.98 ± 0.02                | 99.90 ± 0.21  | 99.97 ± 0.04  |
| 475                    | 99.98 ± 0.02                | 99.92 ± 0.17  | 99.97 ± 0.04  |
| 485                    | 99.98 ± 0.02                | 99.93 ± 0.15  | 99.97 ± 0.04  |
| 495                    | 99.98 ± 0.02                | 99.93 ± 0.13  | 99.97 ± 0.04  |
| 505                    | 99.98 ± 0.02                | 99.94 ± 0.13  | 99.97 ± 0.04  |
| 515                    | 99.98 ± 0.02                | 99.94 ± 0.12  | 99.97 ± 0.04  |
| 525                    | 99.98 ± 0.02                | 99.94 ± 0.11  | 99.98 ± 0.04  |
| 535                    | 99.98 ± 0.02                | 99.94 ± 0.11  | 99.98 ± 0.04  |
| 545                    | 99.98 ± 0.02                | 99.95 ± 0.10  | 99.98 ± 0.04  |
| 555                    | 99.98 ± 0.02                | 99.95 ± 0.09  | 99.98 ± 0.04  |
| 565                    | 99.98 ± 0.02                | 99.96 ± 0.07  | 99.98 ± 0.04  |
| 575                    | 99.98 ± 0.02                | 99.97 ± 0.06  | 99.98 ± 0.04  |
| 585                    | 99.98 ± 0.02                | 99.97 ± 0.05  | 99.98 ± 0.04  |
| 595                    | 99.98 ± 0.02                | 99.98 ± 0.04  | 99.98 ± 0.04  |
| 605                    | 99.98 ± 0.02                | 99.98 ± 0.03  | 99.98 ± 0.04  |
| 615                    | 99.98 ± 0.02                | 99.99 ± 0.03  | 99.98 ± 0.03  |
| 625                    | 99.98 ± 0.02                | 99.99 ± 0.03  | 99.98 ± 0.03  |
| 635                    | 99.98 ± 0.01                | 99.99 ± 0.03  | 99.99 ± 0.03  |
| 645                    | 99.99 ± 0.01                | 99.99 ± 0.03  | 99.99 ± 0.02  |
| 655                    | 99.99 ± 0.01                | 99.99 ± 0.03  | 100 ± 0       |
| 665                    | 99.99 ± 0.01                | 99.99 ± 0.03  | 100 ± 0       |
| 675                    | 99.99 ± 0.01                | 99.99 ± 0.03  | 100 ± 0       |
| 685                    | 99.99 ± 0.01                | 99.99 ± 0.03  | 100 ± 0       |
| 695                    | 99.99 ± 0.01                | 99.99 ± 0.03  | 100 ± 0       |
| 705                    | 99.99 ± 0.01                | 99.99 ± 0.03  | 100 ± 0       |

Continued

**Supplementary Table SI** *Continued*

| <b>B.</b>              |                             |               |               |
|------------------------|-----------------------------|---------------|---------------|
| <b>Bin centre (nm)</b> | <b>Percentile undersize</b> |               |               |
|                        | <b>Nz (%)</b>               | <b>SA (%)</b> | <b>OA (%)</b> |
| 715                    | 100 ± 0                     | 99.99 ± 0.03  | 100 ± 0       |
| 725                    | 100 ± 0                     | 99.99 ± 0.03  | 100 ± 0       |
| 735                    | 100 ± 0                     | 99.99 ± 0.03  | 100 ± 0       |
| 745                    | 100 ± 0                     | 99.99 ± 0.03  | 100 ± 0       |
| 755                    | 100 ± 0                     | 99.99 ± 0.03  | 100 ± 0       |
| 765                    | 100 ± 0                     | 99.99 ± 0.03  | 100 ± 0       |
| 775                    | 100 ± 0                     | 99.99 ± 0.03  | 100 ± 0       |
| 785                    | 100 ± 0                     | 99.99 ± 0.03  | 100 ± 0       |
| 795                    | 100 ± 0                     | 99.99 ± 0.03  | 100 ± 0       |
| 805                    | 100 ± 0                     | 99.99 ± 0.03  | 100 ± 0       |
| 815                    | 100 ± 0                     | 99.99 ± 0.03  | 100 ± 0       |
| 825                    | 100 ± 0                     | 99.99 ± 0.03  | 100 ± 0       |
| 835                    | 100 ± 0                     | 99.99 ± 0.03  | 100 ± 0       |
| 845                    | 100 ± 0                     | 99.99 ± 0.03  | 100 ± 0       |
| 855                    | 100 ± 0                     | 99.99 ± 0.03  | 100 ± 0       |
| 865                    | 100 ± 0                     | 99.99 ± 0.03  | 100 ± 0       |
| 875                    | 100 ± 0                     | 99.99 ± 0.03  | 100 ± 0       |
| 885                    | 100 ± 0                     | 99.99 ± 0.03  | 100 ± 0       |
| 895                    | 100 ± 0                     | 99.99 ± 0.03  | 100 ± 0       |
| 905                    | 100 ± 0                     | 99.99 ± 0.03  | 100 ± 0       |
| 915                    | 100 ± 0                     | 99.99 ± 0.03  | 100 ± 0       |
| 925                    | 100 ± 0                     | 99.99 ± 0.03  | 100 ± 0       |
| 935                    | 100 ± 0                     | 99.99 ± 0.03  | 100 ± 0       |
| 945                    | 100 ± 0                     | 99.99 ± 0.03  | 100 ± 0       |
| 955                    | 100 ± 0                     | 99.99 ± 0.03  | 100 ± 0       |
| 965                    | 100 ± 0                     | 99.99 ± 0.03  | 100 ± 0       |
| 975                    | 100 ± 0                     | 99.99 ± 0.03  | 100 ± 0       |
| 985                    | 100 ± 0                     | 99.99 ± 0.03  | 100 ± 0       |
| 995                    | 100 ± 0                     | 100 ± 0       | 100 ± 0       |

A. Merged data. B. Percentile of particle concentration by size. Size numbers ± SD are given for each group of individuals with different diagnoses. Nz, normozoospermic individuals; SA, infertile patients with secretory azoospermia; OA, infertile patients with obstructive azoospermia.
