# Supplementary material for: Exosomal microRNAs in seminal plasma are markers of the origin of azoospermia and can predict the presence of sperm in testicular tissue
Source: PubMed Central journal article supplement — Hum Reprod. 2018 Apr 4;33(6):1087–98. doi: 10.1093/humrep/dey072 (PMC5972609; doi:10.1093/humrep/dey072), 2018-04-04
Supplement: dey072suppl_table2.pdf [file dey072suppl_table2.pdf]

**Supplementary Table SII** List of the 70 miRNAs showing the most stable expression among samples.

| miRNAs                                              | Nz1<br>Cp value | Nz2<br>Cp value | Nz3<br>Cp value | OAI<br>Cp value | OA2<br>Cp value | OA3<br>Cp value | SA1<br>Cp value | SA2<br>Cp value | SA3<br>Cp value | Mean<br>(Cp value) | SD<br>(Cp value) | CV<br>(Cp value) |
|-----------------------------------------------------|-----------------|-----------------|-----------------|-----------------|-----------------|-----------------|-----------------|-----------------|-----------------|--------------------|------------------|------------------|
| Average of 50 stable miRNAs (selected to normalize) | 29.12           | 29.22           | 29.20           | 28.54           | 29.22           | 29.47           | 28.99           | 29.37           | 28.67           | 29.09              | 0.31             | 0.0106           |
| <b>hsa-miR-200a-5p</b>                              | 29.59           | 29.71           | 29.91           | 29.65           | 30.13           | 30.08           | 29.67           | 29.70           | 29.46           | 29.77              | 0.22             | 0.0075           |
| <b>hsa-let-7b-3p</b>                                | 29.57           | 29.51           | 29.45           | 29.31           | 29.53           | 29.72           | 29.66           | 29.90           | 29.16           | 29.53              | 0.22             | 0.0074           |
| <b>hsa-miR-141-5p</b>                               | 28.97           | 29.17           | 28.99           | 28.47           | 29.03           | 29.09           | 28.80           | 29.10           | 28.56           | 28.91              | 0.25             | 0.0086           |
| <b>hsa-miR-664a-3p</b>                              | 30.10           | 29.69           | 29.95           | 29.77           | 30.02           | 29.95           | 29.80           | 30.49           | 29.72           | 29.95              | 0.25             | 0.0083           |
| <b>hsa-miR-20a-3p</b>                               | 29.08           | 29.29           | 28.98           | 28.55           | 28.82           | 29.16           | 28.68           | 29.25           | 28.57           | 28.93              | 0.29             | 0.0099           |
| <b>hsa-miR-200c-5p</b>                              | 31.58           | 31.74           | 31.89           | 31.52           | 32.43           | 31.71           | 31.90           | 31.46           | 31.12           | 31.71              | 0.36             | 0.0114           |
| <b>hsa-miR-339-5p</b>                               | 28.34           | 28.12           | 28.03           | 27.47           | 28.00           | 28.23           | 27.84           | 28.46           | 27.51           | 28.00              | 0.34             | 0.0123           |
| <b>hsa-miR-590-3p</b>                               | 31.23           | 31.70           | 31.05           | 30.89           | 30.78           | 31.50           | 30.78           | 31.17           | 30.68           | 31.09              | 0.35             | 0.0111           |
| <b>hsa-miR-425-5p</b>                               | 27.55           | 27.81           | 27.81           | 27.09           | 27.82           | 27.90           | 27.35           | 27.82           | 27.28           | 27.60              | 0.30             | 0.0108           |
| <b>hsa-miR-93-3p</b>                                | 29.77           | 29.27           | 30.04           | 28.79           | 29.79           | 29.81           | 29.51           | 29.47           | 29.15           | 29.51              | 0.39             | 0.0132           |
| <b>hsa-miR-671-3p</b>                               | 31.79           | 32.16           | 32.22           | 31.64           | 32.36           | 32.87           | 31.95           | 32.56           | 31.66           | 32.13              | 0.42             | 0.0131           |
| <b>hsa-miR-1468-5p</b>                              | 32.35           | 32.32           | 33.06           | 31.99           | 32.54           | 32.75           | 33.00           | 32.76           | 31.85           | 32.51              | 0.42             | 0.0130           |
| <b>hsa-miR-99b-3p</b>                               | 31.70           | 31.29           | 31.63           | 30.85           | 32.12           | 32.07           | 31.44           | 31.92           | 31.33           | 31.60              | 0.41             | 0.0130           |
| <b>hsa-miR-505-3p</b>                               | 29.89           | 30.30           | 30.27           | 29.64           | 30.62           | 30.55           | 29.75           | 30.63           | 29.67           | 30.15              | 0.41             | 0.0137           |
| <b>hsa-let-7e-3p</b>                                | 32.45           | 32.78           | 32.43           | 31.55           | 32.67           | 33.16           | 32.16           | 32.73           | 32.75           | 32.52              | 0.46             | 0.0141           |
| <b>hsa-miR-26b-3p</b>                               | 32.30           | 32.15           | 31.56           | 31.27           | 31.63           | 31.82           | 31.30           | 32.09           | 31.12           | 31.69              | 0.42             | 0.0134           |
| <b>hsa-miR-425-3p</b>                               | 29.83           | 29.92           | 29.75           | 29.03           | 30.04           | 30.06           | 29.56           | 30.03           | 29.38           | 29.73              | 0.35             | 0.0118           |
| <b>hsa-miR-590-5p</b>                               | 27.52           | 27.53           | 27.72           | 27.00           | 27.79           | 28.20           | 27.57           | 27.84           | 26.99           | 27.57              | 0.39             | 0.0141           |
| <b>hsa-miR-362-3p</b>                               | 29.87           | 30.31           | 29.67           | 29.47           | 30.04           | 30.53           | 30.03           | 30.50           | 29.74           | 30.02              | 0.37             | 0.0124           |
| <b>hsa-miR-7-1-3p</b>                               | 28.99           | 28.65           | 28.52           | 28.48           | 29.07           | 29.15           | 28.24           | 29.24           | 28.64           | 28.77              | 0.35             | 0.0121           |
| <b>hsa-miR-24-1-5p</b>                              | 33.59           | 34.29           | 33.17           | 32.89           | 32.95           | 33.70           | 32.97           | 33.36           | 32.80           | 33.30              | 0.49             | 0.0146           |
| <b>hsa-miR-491-5p</b>                               | 29.71           | 29.90           | 29.83           | 29.11           | 29.78           | 30.22           | 29.58           | 29.94           | 28.80           | 29.65              | 0.44             | 0.0149           |
| <b>hsa-miR-339-3p</b>                               | 29.45           | 29.08           | 29.48           | 28.49           | 29.46           | 29.64           | 29.24           | 29.76           | 28.74           | 29.26              | 0.42             | 0.0144           |
| <b>hsa-miR-219a-5p</b>                              | 31.77           | 32.06           | 32.12           | 31.20           | 31.03           | 32.25           | 31.60           | 32.02           | 31.54           | 31.73              | 0.42             | 0.0133           |
| <b>hsa-miR-19b-3p</b>                               | 22.82           | 22.71           | 22.64           | 22.06           | 22.63           | 22.90           | 22.62           | 23.09           | 22.12           | 22.62              | 0.34             | 0.0149           |
| <b>hsa-miR-30c-5p</b>                               | 23.86           | 24.04           | 23.90           | 23.28           | 23.76           | 24.45           | 23.85           | 24.26           | 23.54           | 23.88              | 0.35             | 0.0147           |
| <b>hsa-miR-744-3p</b>                               | 33.07           | 32.92           | 32.50           | 32.22           | 33.14           | 33.57           | 32.53           | 32.88           | 32.00           | 32.76              | 0.49             | 0.0150           |
| <b>hsa-miR-1296-5p</b>                              | 31.31           | 31.37           | 31.05           | 30.34           | 31.45           | 31.48           | 30.97           | 30.94           | 30.37           | 31.03              | 0.43             | 0.0139           |
| <b>hsa-miR-429</b>                                  | 26.23           | 26.93           | 26.67           | 25.90           | 26.31           | 26.78           | 26.02           | 26.91           | 26.08           | 26.43              | 0.40             | 0.0152           |
| <b>hsa-miR-374b-5p</b>                              | 26.28           | 26.43           | 26.61           | 25.73           | 26.45           | 26.76           | 26.51           | 26.68           | 25.70           | 26.35              | 0.39             | 0.0147           |
| <b>hsa-let-7f-2-3p</b>                              | 31.76           | 31.98           | 31.25           | 31.08           | 31.09           | 31.11           | 31.28           | 32.12           | 31.18           | 31.43              | 0.41             | 0.0131           |

Continued

**Supplementary Table SII** *Continued*

| <b>miRNAs</b>           | <b>Nz1<br/>Cp value</b> | <b>Nz2<br/>Cp value</b> | <b>Nz3<br/>Cp value</b> | <b>OA1<br/>Cp value</b> | <b>OA2<br/>Cp value</b> | <b>OA3<br/>Cp value</b> | <b>SA1<br/>Cp value</b> | <b>SA2<br/>Cp value</b> | <b>SA3<br/>Cp value</b> | <b>Mean<br/>(Cp value)</b> | <b>SD<br/>(Cp value)</b> | <b>CV<br/>(Cp value)</b> |
|-------------------------|-------------------------|-------------------------|-------------------------|-------------------------|-------------------------|-------------------------|-------------------------|-------------------------|-------------------------|----------------------------|--------------------------|--------------------------|
| <b>hsa-miR-582-5p</b>   | 27.15                   | 27.47                   | 28.25                   | 27.54                   | 27.90                   | 27.67                   | 27.48                   | 28.05                   | 27.28                   | 27.64                      | 0.36                     | 0.0130                   |
| <b>hsa-miR-345-5p</b>   | 27.51                   | 27.85                   | 27.63                   | 27.14                   | 28.10                   | 28.13                   | 27.43                   | 27.95                   | 27.06                   | 27.64                      | 0.39                     | 0.0142                   |
| <b>hsa-miR-140-5p</b>   | 29.45                   | 30.04                   | 29.75                   | 28.86                   | 29.55                   | 30.49                   | 29.61                   | 29.45                   | 29.30                   | 29.61                      | 0.46                     | 0.0156                   |
| <b>hsa-miR-200a-3p</b>  | 23.47                   | 23.96                   | 23.84                   | 23.17                   | 23.99                   | 24.26                   | 23.47                   | 23.76                   | 23.24                   | 23.69                      | 0.37                     | 0.0155                   |
| <b>hsa-miR-374a-5p</b>  | 27.50                   | 28.25                   | 28.05                   | 26.93                   | 27.55                   | 27.95                   | 27.84                   | 28.12                   | 27.14                   | 27.70                      | 0.45                     | 0.0163                   |
| <b>hsa-miR-101-3p</b>   | 24.22                   | 24.69                   | 24.33                   | 23.87                   | 24.47                   | 24.99                   | 24.00                   | 24.81                   | 24.00                   | 24.38                      | 0.39                     | 0.0162                   |
| <b>hsa-miR-200b-3p</b>  | 22.12                   | 21.96                   | 22.19                   | 21.60                   | 22.44                   | 22.63                   | 21.93                   | 22.00                   | 21.59                   | 22.05                      | 0.34                     | 0.0157                   |
| <b>hsa-miR-19a-3p</b>   | 25.06                   | 25.63                   | 25.32                   | 24.66                   | 25.13                   | 25.66                   | 25.47                   | 25.93                   | 24.91                   | 25.31                      | 0.40                     | 0.0160                   |
| <b>hsa-miR-30b-5p</b>   | 23.24                   | 23.37                   | 23.29                   | 22.82                   | 23.24                   | 23.86                   | 23.29                   | 23.80                   | 22.82                   | 23.30                      | 0.36                     | 0.0155                   |
| <b>hsa-miR-33b-3p</b>   | 31.90                   | 31.66                   | 32.26                   | 31.47                   | 32.01                   | 32.15                   | 33.05                   | 32.24                   | 32.04                   | 32.09                      | 0.44                     | 0.0139                   |
| <b>hsa-miR-532-3p</b>   | 27.76                   | 27.79                   | 28.15                   | 27.36                   | 28.10                   | 28.70                   | 27.88                   | 28.11                   | 27.52                   | 27.93                      | 0.39                     | 0.0142                   |
| <b>hsa-miR-629-3p</b>   | 34.23                   | 33.10                   | 33.86                   | 32.80                   | 33.24                   | 33.18                   | 32.97                   | 33.96                   | 33.19                   | 33.39                      | 0.50                     | 0.0149                   |
| <b>hsa-miR-598-3p</b>   | 29.19                   | 28.82                   | 29.07                   | 28.57                   | 29.54                   | 29.53                   | 28.99                   | 29.10                   | 27.97                   | 28.98                      | 0.49                     | 0.0168                   |
| <b>hsa-miR-29b-2-5p</b> | 28.74                   | 29.04                   | 28.91                   | 28.04                   | 29.09                   | 29.47                   | 28.57                   | 29.13                   | 28.18                   | 28.80                      | 0.47                     | 0.0162                   |
| <b>hsa-miR-128-3p</b>   | 30.27                   | 31.47                   | 30.86                   | 29.84                   | 30.37                   | 30.71                   | 29.99                   | 30.58                   | 30.14                   | 30.47                      | 0.50                     | 0.0164                   |
| <b>hsa-miR-29a-5p</b>   | 28.68                   | 28.12                   | 28.24                   | 27.71                   | 28.24                   | 28.83                   | 28.10                   | 29.05                   | 27.80                   | 28.31                      | 0.46                     | 0.0161                   |
| <b>hsa-miR-24-2-5p</b>  | 32.61                   | 32.65                   | 32.94                   | 31.45                   | 33.52                   | 33.03                   | 32.48                   | 32.75                   | 32.93                   | 32.71                      | 0.56                     | 0.0172                   |
| <b>hsa-miR-20b-3p</b>   | 30.01                   | 29.95                   | 30.29                   | 28.92                   | 30.24                   | 29.90                   | 30.34                   | 30.28                   | 29.24                   | 29.91                      | 0.50                     | 0.0168                   |
| <b>hsa-miR-301a-3p</b>  | 30.32                   | 29.99                   | 30.61                   | 29.65                   | 30.93                   | 31.29                   | 30.60                   | 30.36                   | 29.71                   | 30.39                      | 0.54                     | 0.0179                   |
| hsa-miR-335-5p          | 29.78                   | 30.36                   | 30.27                   | 29.77                   | 30.37                   | 31.19                   | 29.65                   | 30.30                   | 29.62                   | 30.15                      | 0.50                     | 0.0167                   |
| hsa-miR-126-5p          | 32.66                   | 33.72                   | 33.79                   | 32.90                   | 32.95                   | 33.69                   | 33.71                   | 33.76                   | 33.07                   | 33.36                      | 0.46                     | 0.0137                   |
| hsa-miR-141-3p          | 21.62                   | 21.66                   | 21.62                   | 20.96                   | 21.63                   | 22.06                   | 21.28                   | 21.94                   | 21.18                   | 21.55                      | 0.35                     | 0.0164                   |
| hsa-miR-186-5p          | 29.81                   | 30.47                   | 30.45                   | 29.51                   | 29.69                   | 30.61                   | 29.99                   | 30.76                   | 29.79                   | 30.12                      | 0.45                     | 0.0151                   |
| hsa-miR-30e-5p          | 24.78                   | 24.49                   | 24.68                   | 23.93                   | 24.78                   | 25.44                   | 24.66                   | 24.89                   | 24.21                   | 24.65                      | 0.42                     | 0.0173                   |
| hsa-miR-200b-5p         | 27.47                   | 26.70                   | 27.62                   | 26.80                   | 27.74                   | 27.92                   | 27.33                   | 27.11                   | 26.78                   | 27.27                      | 0.45                     | 0.0165                   |
| hsa-let-7d-3p           | 27.87                   | 29.27                   | 28.60                   | 27.82                   | 28.53                   | 28.74                   | 27.91                   | 28.43                   | 27.99                   | 28.35                      | 0.49                     | 0.0174                   |
| hsa-miR-25-3p           | 26.10                   | 25.45                   | 25.95                   | 25.34                   | 26.13                   | 26.56                   | 25.96                   | 25.73                   | 25.07                   | 25.81                      | 0.46                     | 0.0179                   |
| hsa-miR-26a-1-3p        | 34.54                   | 33.50                   | 33.85                   | 33.35                   | 34.02                   | 34.15                   | 33.31                   | 34.50                   | 32.80                   | 33.78                      | 0.59                     | 0.0174                   |
| hsa-miR-193a-5p         | 29.43                   | 29.03                   | 29.54                   | 28.65                   | 29.13                   | 29.79                   | 28.82                   | 29.64                   | 28.38                   | 29.16                      | 0.48                     | 0.0164                   |
| hsa-miR-18b-5p          | 28.27                   | 28.80                   | 29.05                   | 27.52                   | 28.73                   | 28.70                   | 28.52                   | 28.59                   | 27.80                   | 28.44                      | 0.49                     | 0.0174                   |
| hsa-miR-99b-5p          | 25.65                   | 25.59                   | 26.18                   | 24.99                   | 26.22                   | 26.27                   | 25.49                   | 26.32                   | 25.47                   | 25.80                      | 0.47                     | 0.0181                   |
| hsa-miR-125b-2-3p       | 29.12                   | 29.06                   | 29.38                   | 28.50                   | 29.88                   | 29.77                   | 28.95                   | 29.80                   | 28.66                   | 29.24                      | 0.50                     | 0.0172                   |
| hsa-miR-16-2-3p         | 33.73                   | 34.28                   | 33.27                   | 33.01                   | 33.47                   | 33.81                   | 33.57                   | 34.53                   | 32.65                   | 33.59                      | 0.59                     | 0.0176                   |
| hsa-miR-454-3p          | 29.48                   | 29.61                   | 29.66                   | 28.82                   | 29.85                   | 30.28                   | 29.73                   | 29.97                   | 28.66                   | 29.56                      | 0.52                     | 0.0176                   |

*Continued*

**Supplementary Table SII** *Continued*

| <b>miRNAs</b>         | <b>Nz1<br/>Cp value</b> | <b>Nz2<br/>Cp value</b> | <b>Nz3<br/>Cp value</b> | <b>OAI<br/>Cp value</b> | <b>OA2<br/>Cp value</b> | <b>OA3<br/>Cp value</b> | <b>SA1<br/>Cp value</b> | <b>SA2<br/>Cp value</b> | <b>SA3<br/>Cp value</b> | <b>Mean<br/>(Cp value)</b> | <b>SD<br/>(Cp value)</b> | <b>CV<br/>(Cp value)</b> |
|-----------------------|-------------------------|-------------------------|-------------------------|-------------------------|-------------------------|-------------------------|-------------------------|-------------------------|-------------------------|----------------------------|--------------------------|--------------------------|
| hsa-miR-324-3p        | 27.51                   | 27.78                   | 28.00                   | 26.64                   | 27.49                   | 27.94                   | 27.50                   | 27.86                   | 26.82                   | 27.50                      | 0.48                     | 0.0175                   |
| hsa-miR-18a-5p        | 28.69                   | 29.15                   | 29.77                   | 28.04                   | 29.01                   | 29.29                   | 28.73                   | 28.95                   | 28.56                   | 28.91                      | 0.49                     | 0.0169                   |
| hsa-miR-148b-5p       | 32.18                   | 32.57                   | 32.88                   | 31.96                   | 33.20                   | 33.36                   | 32.54                   | 32.22                   | 31.98                   | 32.54                      | 0.51                     | 0.0158                   |
| hsa-miR-19b-1-5p      | 32.02                   | 32.68                   | 32.35                   | 31.53                   | 32.69                   | 32.67                   | 32.54                   | 32.11                   | 31.30                   | 32.21                      | 0.51                     | 0.0160                   |
| <i>hsa-miR-30d-5p</i> | 23.91                   | 23.84                   | 24.31                   | 23.24                   | 24.00                   | 24.65                   | 23.93                   | 24.24                   | 23.45                   | 23.95                      | 0.43                     | 0.0179                   |

Data from the 50 most stable miRNAs (in bold) were selected to normalize data from miRNA profiling.  
hsa-miR-30e-5p and hsa-miR-30d-5p (in italic) were selected to normalize data from candidate miRNAs.
