# Supplementary material for: Exosomal microRNAs in seminal plasma are markers of the origin of azoospermia and can predict the presence of sperm in testicular tissue
Source: PubMed Central journal article supplement — Hum Reprod. 2018 Apr 4;33(6):1087–98. doi: 10.1093/humrep/dey072 (PMC5972609; doi:10.1093/humrep/dey072), 2018-04-04
Supplement: dey072suppl_table3.pdf [file dey072suppl_table3.pdf]

**Supplementary Table SIII List of the miRNA PCR primers and conditions for real-time PCR.**

| miRNA          | 5'-3' sequence         | ID <sup>a</sup> | Lightcycler <sup>®</sup> 96 Instrument settings  |
|----------------|------------------------|-----------------|--------------------------------------------------|
| hsa-miR-182-3p | UGGUUCUAGACUUGCCAACUA  | 204098          | Polymerase Activation/ Denaturation 95°C, 10 min |
| hsa-miR-192-3p | CUGCCAUUCCAUAAGGUCACAG | 204272          |                                                  |
| hsa-miR-205-5p | UCCUUCAUCCACCGGAGUCUG  | 204487          | Amplification 40 amplification cycles:           |
| hsa-miR-30d-5p | UGUAAACAUCCCCGACUGGAAG | 206047          | 95°C, 10 s                                       |
| hsa-miR-30e-3p | CUUUCAGUCGGAUGUUUACAGC | 204410          | 60°C, 1 min                                      |
| hsa-miR-31-5p  | AGGCAAGAUGCUGGCAUAGCU  | 204236          | (Ramp-rate 1.6°C/s)                              |
| hsa-miR-539-5p | GGAGAAUUUAUCCUUGGUGUGU | 205656          |                                                  |
| hsa-miR-934    | UGUCUACUACUGGAGACACUGG | 206086          |                                                  |
| hsa-miR-941    | CACCCGGCUGUGGCACAUGUGC | 204574          |                                                  |

<sup>a</sup>miRCURY LNA<sup>™</sup> Universal RT microRNA PCR LNA<sup>™</sup> PCR primers set (Exiqon).
