# Supplementary material for: Exosomal microRNAs in seminal plasma are markers of the origin of azoospermia and can predict the presence of sperm in testicular tissue
Source: PubMed Central journal article supplement — Hum Reprod. 2018 Apr 4;33(6):1087–98. doi: 10.1093/humrep/dey072 (PMC5972609; doi:10.1093/humrep/dey072), 2018-04-04
Supplement: dey072suppl_table4.pdf [file dey072suppl_table4.pdf]

**Supplementary Table SIV Summary of miRNA expression data in OA and in SA phenotypes related to Nz.**

| miRNA                          | Average Cp <sub>Nz</sub> | Average Cp <sub>OA</sub> | Average Cp <sub>SA</sub> | miRNA expression |         |        | P-value       |               |
|--------------------------------|--------------------------|--------------------------|--------------------------|------------------|---------|--------|---------------|---------------|
|                                |                          |                          |                          | Nz               | OA      | SA     | OA-Nz         | SA-Nz         |
| hsa-let-7a-5p                  | 20.57                    | 20.30                    | 20.17                    |                  | 1.124   | 1.173  | >0.10         | >0.10         |
| hsa-let-7b-3p                  | 29.51                    | 29.52                    | 29.57                    |                  | 0.926   | 0.853  | >0.10         | 0.0518        |
| hsa-let-7b-5p                  | 21.54                    | 21.35                    | 21.25                    |                  | 1.063   | 1.088  | >0.10         | >0.10         |
| hsa-let-7c-5p                  | 23.01                    | 22.63                    | 22.60                    |                  | 1.215   | 1.185  | >0.10         | >0.10         |
| hsa-let-7d-3p                  | 28.58                    | 28.36                    | 28.11                    |                  | 1.085   | 1.233  | >0.10         | >0.10         |
| hsa-let-7d-5p                  | 27.16                    | 27.13                    | 26.79                    |                  | 0.957   | 1.149  | >0.10         | >0.10         |
| hsa-let-7e-3p                  | 32.56                    | 32.46                    | 32.55                    |                  | 0.997   | 0.897  | >0.10         | >0.10         |
| hsa-let-7e-5p                  | 25.56                    | 25.26                    | 25.10                    |                  | 1.146   | 1.223  | >0.10         | >0.10         |
| hsa-let-7f-1-3p                | 34.25                    | 34.02                    | 33.23                    |                  | 1.093   | 1.808* | >0.10         | <b>0.0370</b> |
| hsa-let-7f-2-3p                | 31.66                    | 31.09                    | 31.53                    |                  | 1.388   | 0.978  | >0.10         | >0.10         |
| hsa-let-7f-5p                  | 24.47                    | 24.02                    | 23.70                    |                  | 1.269   | 1.514  | >0.10         | >0.10         |
| hsa-let-7g-5p                  | 23.48                    | 23.28                    | 22.92                    |                  | 1.068   | 1.311  | >0.10         | >0.10         |
| hsa-let-7i-3p                  | 36.30                    | 35.97                    | 35.56                    |                  | 1.183   | 1.514  | >0.10         | >0.10         |
| hsa-let-7i-5p                  | 27.92                    | 27.70                    | 27.40                    |                  | 1.087   | 1.277  | >0.10         | >0.10         |
| hsa-miR-100-5p                 | 27.78                    | 28.24                    | 28.45                    |                  | 0.675   | 0.557  | >0.10         | >0.10         |
| hsa-miR-101-3p                 | 24.41                    | 24.45                    | 24.27                    |                  | 0.911   | 0.980  | >0.10         | >0.10         |
| hsa-miR-101-5p                 | 32.12                    | 31.73                    | 31.66                    |                  | 1.221   | 1.222  | >0.10         | >0.10         |
| hsa-miR-103a-3p                | 23.06                    | 22.85                    | 22.70                    |                  | 1.079   | 1.136  | >0.10         | >0.10         |
| hsa-miR-106a-3p <sup>5cX</sup> | 33.74                    | 33.10                    | 32.83                    |                  | 1.451   | 1.674  | >0.10         | >0.10         |
| hsa-miR-106a-5p <sup>5cX</sup> | 22.54                    | 22.48                    | 22.45                    |                  | 0.972   | 0.952  | >0.10         | >0.10         |
| hsa-miR-106b-3p                | 31.44                    | 31.09                    | 30.86                    |                  | 1.190   | 1.334  | >0.10         | >0.10         |
| hsa-miR-106b-5p                | 26.35                    | 25.86                    | 25.88                    |                  | 1.311   | 1.233  | >0.10         | >0.10         |
| hsa-miR-107                    | 24.85                    | 24.49                    | 24.65                    |                  | 1.198   | 1.019  | >0.10         | >0.10         |
| hsa-miR-10a-3p                 | 35.86                    | 36.47                    | 35.21                    |                  | 0.422   | 1.230  | >0.10         | >0.10         |
| hsa-miR-10a-5p                 | 28.77                    | 29.63                    | 29.59                    |                  | 0.513   | 0.505  | >0.10         | >0.10         |
| hsa-miR-10b-3p                 | 34.39                    | 35.96                    | 34.33                    |                  | 0.313*  | 0.923  | <b>0.0261</b> | >0.10         |
| hsa-miR-10b-5p                 | 24.98                    | 25.69                    | 25.00                    |                  | 0.571   | 0.877  | >0.10         | >0.10         |
| hsa-miR-1224-3p                | 36.23                    | 34.01                    | 34.56                    |                  | 4.568   | 2.618  | >0.10         | >0.10         |
| hsa-miR-122-5p                 | 32.64                    | 35.87                    | 35.20                    |                  | 0.094*  | 0.133* | <b>0.0220</b> | <b>0.0324</b> |
| hsa-miR-124-3p                 | 36.79                    | <b>40.00</b>             | 37.67                    |                  | 0.101** | 0.481  | <b>0.0012</b> | >0.10         |
| hsa-miR-1249                   | 35.77                    | 33.99                    | 33.88                    |                  | 3.103   | 3.377  | >0.10         | >0.10         |
| hsa-miR-125a-3p                | 32.16                    | 31.96                    | 31.86                    |                  | 1.067   | 1.092  | >0.10         | >0.10         |
| hsa-miR-125a-5p                | 23.75                    | 23.58                    | 23.46                    |                  | 1.048   | 1.088  | >0.10         | >0.10         |
| hsa-miR-125b-2-3p              | 29.19                    | 29.39                    | 29.14                    |                  | 0.814   | 0.922  | >0.10         | >0.10         |
| hsa-miR-125b-5p                | 21.95                    | 22.30                    | 22.04                    |                  | 0.730   | 0.834  | >0.10         | >0.10         |
| hsa-miR-1260a                  | 22.09                    | 21.97                    | 22.17                    |                  | 1.016   | 0.846  | >0.10         | >0.10         |
| hsa-miR-126-3p                 | 28.52                    | 28.58                    | 28.19                    |                  | 0.894   | 1.116  | >0.10         | >0.10         |
| hsa-miR-126-5p                 | 33.40                    | 33.18                    | 33.52                    |                  | 1.083   | 0.817  | >0.10         | >0.10         |
| hsa-miR-1267                   | 35.62                    | 35.66                    | 36.20                    |                  | 0.916   | 0.532  | >0.10         | >0.10         |
| hsa-miR-1270                   | <b>40.00</b>             | 36.45                    | 37.17                    |                  | 10.920  | 6.340  | >0.10         | >0.10         |
| hsa-miR-1271-5p                | 34.87                    | 35.47                    | 34.74                    |                  | 0.739   | 0.861  | >0.10         | >0.10         |
| hsa-miR-127-3p                 | 31.52                    | 30.93                    | 31.78                    |                  | 1.405   | 0.744  | >0.10         | >0.10         |
| hsa-miR-128-3p                 | 30.87                    | 30.31                    | 30.24                    |                  | 1.380   | 1.376  | >0.10         | >0.10         |
| hsa-miR-1296-5p                | 31.25                    | 31.09                    | 30.76                    |                  | 1.039   | 1.244  | >0.10         | >0.10         |
| hsa-miR-130a-3p                | 32.80                    | 32.58                    | 32.39                    |                  | 1.082   | 1.176  | >0.10         | >0.10         |
| hsa-miR-130b-3p                | 32.29                    | 32.11                    | 32.25                    |                  | 0.919   | 0.913  | >0.10         | >0.10         |

Continued

Supplementary Table SIV *Continued*

| miRNA             | Average Cp <sub>Nz</sub> | Average Cp <sub>OA</sub> | Average Cp <sub>SA</sub> | miRNA expression |        |        | P-value       |               |
|-------------------|--------------------------|--------------------------|--------------------------|------------------|--------|--------|---------------|---------------|
|                   |                          |                          |                          | Nz               | OA     | SA     | OA-Nz         | SA-Nz         |
| hsa-miR-130b-5p   | 32.34                    | 32.58                    | 33.01                    | 1                | 0.791  | 0.560  | >0.10         | >0.10         |
| hsa-miR-132-3p    | 27.29                    | 27.69                    | 27.58                    | 1                | 0.706  | 0.725  | >0.10         | >0.10         |
| hsa-miR-132-5p    | 32.32                    | 32.79                    | 33.28                    | 1                | 0.674  | 0.456* | >0.10         | <b>0.0484</b> |
| hsa-miR-134-5p    | 34.53                    | 33.33                    | 33.84                    | 1                | 2.152  | 1.440  | >0.10         | >0.10         |
| hsa-miR-135a-5p   | 23.77                    | 23.73                    | 23.77                    | 1                | 0.954  | 0.885  | >0.10         | >0.10         |
| hsa-miR-135b-5p   | 29.37                    | 31.07                    | 30.37                    | 1                | 0.288  | 0.446  | 0.0703        | >0.10         |
| hsa-miR-136-3p    | 34.55                    | 33.85                    | 34.22                    | 1                | 1.523  | 0.990  | >0.10         | >0.10         |
| hsa-miR-136-5p    | 33.15                    | 31.44                    | 32.37                    | 1                | 3.053  | 1.526  | >0.10         | >0.10         |
| hsa-miR-139-5p    | 35.31                    | 36.26                    | 35.73                    | 1                | 0.484  | 0.667  | >0.10         | >0.10         |
| hsa-miR-140-3p    | 27.30                    | 27.52                    | 27.41                    | 1                | 0.805  | 0.828  | >0.10         | >0.10         |
| hsa-miR-140-5p    | 29.75                    | 29.64                    | 29.45                    | 1                | 1.008  | 1.091  | >0.10         | >0.10         |
| hsa-miR-141-3p    | 21.63                    | 21.55                    | 21.47                    | 1                | 0.990  | 0.998  | >0.10         | >0.10         |
| hsa-miR-141-5p    | 29.05                    | 28.87                    | 28.81                    | 1                | 1.057  | 1.044  | >0.10         | >0.10         |
| hsa-miR-142-3p    | 32.00                    | 31.71                    | 32.66                    | 1                | 1.145  | 0.564  | >0.10         | >0.10         |
| hsa-miR-142-5p    | 36.12                    | 36.26                    | 35.74                    | 1                | 0.833  | 1.460  | >0.10         | >0.10         |
| hsa-miR-143-3p    | 36.42                    | 35.33                    | 35.36                    | 1                | 1.990  | 1.640  | 0.0861        | >0.10         |
| hsa-miR-144-3p    | 36.18                    | 35.52                    | 35.08                    | 1                | 1.290  | 1.891  | >0.10         | >0.10         |
| hsa-miR-145-5p    | 35.77                    | 36.35                    | 35.93                    | 1                | 0.594  | 0.895  | >0.10         | >0.10         |
| hsa-miR-1468-5p   | 32.58                    | 32.43                    | 32.53                    | 1                | 1.037  | 0.918  | >0.10         | >0.10         |
| hsa-miR-146a-5p   | 29.83                    | 28.95                    | 29.27                    | 1                | 1.794  | 1.369  | >0.10         | >0.10         |
| hsa-miR-146b-3p   | 33.72                    | 35.14                    | 35.61                    | 1                | 0.348  | 0.240  | 0.0737        | >0.10         |
| hsa-miR-146b-5p   | 29.86                    | 31.26                    | 31.04                    | 1                | 0.355  | 0.393  | 0.0738        | 0.0930        |
| hsa-miR-148a-3p   | 23.64                    | 22.78                    | 22.93                    | 1                | 1.708  | 1.465  | >0.10         | >0.10         |
| hsa-miR-148b-3p   | 27.08                    | 26.62                    | 26.36                    | 1                | 1.279  | 1.464  | >0.10         | >0.10         |
| hsa-miR-148b-5p   | 32.55                    | 32.84                    | 32.25                    | 1                | 0.761  | 1.095  | >0.10         | >0.10         |
| hsa-miR-149-3p    | 31.86                    | 31.37                    | 31.56                    | 1                | 1.310  | 1.091  | >0.10         | >0.10         |
| hsa-miR-149-5p    | 24.69                    | 24.51                    | 24.43                    | 1                | 1.052  | 1.064  | >0.10         | >0.10         |
| hsa-miR-150-5p    | 32.47                    | 33.56                    | 33.46                    | 1                | 0.438  | 0.448  | 0.0837        | 0.0960        |
| hsa-miR-151a-3p   | 26.90                    | 26.93                    | 26.80                    | 1                | 0.913  | 0.953  | >0.10         | >0.10         |
| hsa-miR-151a-5p   | 24.96                    | 25.09                    | 24.67                    | 1                | 0.856  | 1.090  | >0.10         | >0.10         |
| hsa-miR-152-3p    | 27.12                    | 27.01                    | 26.84                    | 1                | 1.007  | 1.081  | >0.10         | >0.10         |
| hsa-miR-153-3p    | 31.24                    | 30.40                    | 29.90                    | 1                | 1.667  | 2.251* | >0.10         | <b>0.0434</b> |
| hsa-miR-1537-3p   | 35.07                    | 35.56                    | 34.80                    | 1                | 0.650  | 1.052  | >0.10         | >0.10         |
| hsa-miR-154-5p    | 32.68                    | 32.22                    | 32.95                    | 1                | 1.284  | 0.740  | 0.0765        | >0.10         |
| hsa-miR-155-5p    | 26.95                    | 27.32                    | 27.13                    | 1                | 0.722  | 0.782  | >0.10         | >0.10         |
| hsa-miR-15a-3p    | <b>38.26</b>             | 35.81                    | 37.55                    | 1                | 5.112  | 1.456  | >0.10         | >0.10         |
| hsa-miR-15a-5p    | 25.62                    | 25.43                    | 25.66                    | 1                | 1.067  | 0.869  | >0.10         | >0.10         |
| hsa-miR-15b-3p    | 32.61                    | 32.56                    | 32.95                    | 1                | 0.962  | 0.703  | >0.10         | 0.0684        |
| hsa-miR-15b-5p    | 28.23                    | 27.64                    | 28.06                    | 1                | 1.400  | 0.999  | >0.10         | >0.10         |
| hsa-miR-16-1-3p   | 33.43                    | 33.17                    | 33.33                    | 1                | 1.115  | 0.949  | >0.10         | >0.10         |
| hsa-miR-16-2-3p   | 33.76                    | 33.43                    | 33.58                    | 1                | 1.175  | 1.007  | >0.10         | >0.10         |
| hsa-miR-16-5p     | 22.09                    | 22.60                    | 22.53                    | 1                | 0.657  | 0.657  | >0.10         | >0.10         |
| hsa-miR-17-3p     | 31.37                    | 30.40                    | 30.30                    | 1                | 1.829  | 1.867  | >0.10         | >0.10         |
| hsa-miR-17-5p     | 29.84                    | 29.46                    | 29.44                    | 1                | 1.217  | 1.176  | >0.10         | >0.10         |
| hsa-miR-181a-2-3p | 33.45                    | 34.02                    | 34.47                    | 1                | 0.628  | 0.436  | >0.10         | >0.10         |
| hsa-miR-181a-5p   | 28.56                    | 30.24                    | 29.52                    | 1                | 0.292* | 0.459  | <b>0.0451</b> | >0.10         |

*Continued*

**Supplementary Table SIV** *Continued*

| miRNA                           | Average Cp <sub>Nz</sub> | Average Cp <sub>OA</sub> | Average Cp <sub>SA</sub> | miRNA expression |        |        | P-value       |               |
|---------------------------------|--------------------------|--------------------------|--------------------------|------------------|--------|--------|---------------|---------------|
|                                 |                          |                          |                          | Nz               | OA     | SA     | OA-Nz         | SA-Nz         |
| hsa-miR-181b-5p                 | 31.40                    | 33.32                    | 32.70                    | 1                | 0.246* | 0.362  | <b>0.0429</b> | 0.0907        |
| hsa-miR-181c-3p                 | 32.96                    | 32.47                    | 33.24                    | 1                | 1.310  | 0.734  | >0.10         | >0.10         |
| hsa-miR-181c-5p                 | 33.58                    | 33.65                    | 34.18                    | 1                | 0.901  | 0.595  | >0.10         | >0.10         |
| hsa-miR-181d-5p                 | 33.67                    | 34.96                    | 34.81                    | 1                | 0.389  | 0.411  | >0.10         | 0.0981        |
| hsa-miR-182-3p                  | 34.10                    | 35.33                    | 33.39                    | 1                | 0.399* | 1.454  | <b>0.0344</b> | >0.10         |
| hsa-miR-182-5p                  | 26.21                    | 26.31                    | 25.95                    | 1                | 0.868  | 1.064  | >0.10         | >0.10         |
| hsa-miR-183-3p                  | 33.75                    | 34.29                    | 33.86                    | 1                | 0.441  | 0.929  | >0.10         | >0.10         |
| hsa-miR-183-5p                  | 27.42                    | 27.55                    | 27.19                    | 1                | 0.851  | 1.045  | >0.10         | >0.10         |
| hsa-miR-185-5p                  | 26.27                    | 26.45                    | 26.17                    | 1                | 0.823  | 0.950  | >0.10         | >0.10         |
| hsa-miR-186-5p                  | 30.24                    | 29.94                    | 30.18                    | 1                | 1.150  | 0.929  | >0.10         | >0.10         |
| hsa-miR-187-3p                  | 28.46                    | 28.74                    | 28.21                    | 1                | 0.769  | 1.057  | >0.10         | >0.10         |
| hsa-miR-187-5p                  | 35.59                    | 35.37                    | 35.24                    | 1                | 0.949  | 1.137  | >0.10         | >0.10         |
| hsa-miR-188-3p <sup>4cX</sup>   | 35.32                    | 33.98                    | 34.24                    | 1                | 2.012  | 1.846  | >0.10         | >0.10         |
| hsa-miR-188-5p <sup>4cX</sup>   | 34.53                    | 34.86                    | 34.71                    | 1                | 0.928  | 0.819  | >0.10         | >0.10         |
| hsa-miR-18a-3p                  | 33.07                    | 33.05                    | 32.72                    | 1                | 0.948  | 1.134  | >0.10         | >0.10         |
| hsa-miR-18a-5p                  | 29.20                    | 28.78                    | 28.74                    | 1                | 1.247  | 1.222  | >0.10         | >0.10         |
| hsa-miR-18b-3p <sup>5cX</sup>   | 34.62                    | 34.16                    | 33.71                    | 1                | 1.290  | 1.673  | >0.10         | >0.10         |
| hsa-miR-18b-5p <sup>5cX</sup>   | 28.71                    | 28.32                    | 28.31                    | 1                | 1.225  | 1.176  | >0.10         | >0.10         |
| hsa-miR-1908-5p                 | 34.42                    | 33.67                    | 34.04                    | 1                | 1.569  | 1.165  | >0.10         | >0.10         |
| hsa-miR-190a-5p                 | 32.63                    | 32.15                    | 32.07                    | 1                | 1.303  | 1.314  | >0.10         | >0.10         |
| hsa-miR-190b                    | 35.94                    | 37.88                    | 36.53                    | 1                | 0.243  | 0.588  | >0.10         | >0.10         |
| hsa-miR-191-3p                  | 34.01                    | 34.35                    | 33.68                    | 1                | 0.734  | 1.117  | >0.10         | >0.10         |
| hsa-miR-191-5p                  | 24.54                    | 24.73                    | 24.36                    | 1                | 0.817  | 1.008  | >0.10         | >0.10         |
| hsa-miR-192-3p                  | 35.30                    | 36.02                    | 34.38                    | 1                | 0.567  | 1.689  | >0.10         | >0.10         |
| hsa-miR-192-5p                  | 28.23                    | 28.77                    | 28.44                    | 1                | 0.641  | 0.769  | >0.10         | 0.0598        |
| hsa-miR-193a-3p                 | 35.00                    | 33.66                    | 34.02                    | 1                | 2.879* | 1.783  | <b>0.0424</b> | >0.10         |
| hsa-miR-193a-5p                 | 29.34                    | 29.19                    | 28.95                    | 1                | 1.031  | 1.164  | >0.10         | >0.10         |
| hsa-miR-193b-3p                 | 26.13                    | 25.77                    | 25.83                    | 1                | 1.196  | 1.096  | >0.10         | >0.10         |
| hsa-miR-193b-5p                 | 31.49                    | 31.31                    | 31.39                    | 1                | 1.056  | 0.952  | >0.10         | >0.10         |
| hsa-miR-194-5p                  | 28.10                    | 28.59                    | 28.18                    | 1                | 0.665  | 0.839  | >0.10         | >0.10         |
| hsa-miR-195-3p                  | 34.44                    | 34.21                    | 34.48                    | 1                | 1.091  | 0.865  | >0.10         | >0.10         |
| hsa-miR-195-5p                  | 25.54                    | 25.56                    | 25.82                    | 1                | 0.916  | 0.734  | >0.10         | >0.10         |
| hsa-miR-196a-5p                 | 34.78                    | 34.09                    | 34.78                    | 1                | 1.498  | 0.890  | >0.10         | >0.10         |
| hsa-miR-196b-3p                 | 30.82                    | 30.56                    | 30.12                    | 1                | 1.123  | 1.451* | >0.10         | <b>0.0463</b> |
| hsa-miR-196b-5p                 | 25.79                    | 25.79                    | 25.50                    | 1                | 0.931  | 1.082  | >0.10         | >0.10         |
| hsa-miR-1972                    | 32.34                    | 32.46                    | 33.20                    | 1                | 0.853  | 0.489  | >0.10         | >0.10         |
| hsa-miR-197-3p                  | 28.24                    | 27.80                    | 27.94                    | 1                | 1.264  | 1.095  | >0.10         | >0.10         |
| hsa-miR-199a-3p                 | 34.82                    | 35.33                    | 35.18                    | 1                | 0.657  | 0.615  | >0.10         | >0.10         |
| hsa-miR-199b-5p                 | 36.39                    | 35.74                    | 35.06                    | 1                | 1.476  | 1.994  | >0.10         | >0.10         |
| hsa-miR-19a-3p                  | 25.34                    | 25.15                    | 25.44                    | 1                | 1.065  | 0.831  | >0.10         | >0.10         |
| hsa-miR-19b-1-5p                | 32.35                    | 32.30                    | 31.98                    | 1                | 0.967  | 1.146  | >0.10         | >0.10         |
| hsa-miR-19b-2-5p <sup>5cX</sup> | 35.94                    | 35.13                    | 35.63                    | 1                | 1.423  | 1.101  | >0.10         | >0.10         |
| hsa-miR-19b-3p <sup>5cX</sup>   | 22.73                    | 22.53                    | 22.61                    | 1                | 1.067  | 0.963  | >0.10         | >0.10         |
| hsa-miR-200a-3p                 | 23.76                    | 23.81                    | 23.49                    | 1                | 0.902  | 1.070  | >0.10         | >0.10         |
| hsa-miR-200a-5p                 | 29.74                    | 29.95                    | 29.61                    | 1                | 0.804  | 0.972  | >0.10         | >0.10         |
| hsa-miR-200b-3p                 | 22.09                    | 22.23                    | 21.84                    | 1                | 0.849  | 1.058  | 0.0888        | >0.10         |

*Continued*

Supplementary Table SIV Continued

| miRNA                         | Average Cp <sub>Nz</sub> | Average Cp <sub>OA</sub> | Average Cp <sub>SA</sub> | miRNA expression |         |         | P-value       |               |
|-------------------------------|--------------------------|--------------------------|--------------------------|------------------|---------|---------|---------------|---------------|
|                               |                          |                          |                          | Nz               | OA      | SA      | OA-Nz         | SA-Nz         |
| hsa-miR-200b-5p               | 27.26                    | 27.49                    | 27.07                    |                  | 0.798   | 1.017   | >0.10         | >0.10         |
| hsa-miR-200c-3p               | 20.38                    | 20.64                    | 20.29                    |                  | 0.782   | 0.950   | >0.10         | >0.10         |
| hsa-miR-200c-5p               | 31.74                    | 31.89                    | 31.49                    |                  | 0.842   | 1.053   | >0.10         | >0.10         |
| hsa-miR-202-3p                | 30.69                    | <b>40.00</b>             | <b>40.00</b>             |                  | 0.001** | 0.001** | <b>0.0004</b> | <b>0.0009</b> |
| hsa-miR-202-5p                | 32.18                    | <b>40.00</b>             | <b>40.00</b>             |                  | 0.004** | 0.004** | <b>0.0001</b> | <b>0.0001</b> |
| hsa-miR-203a                  | 25.16                    | 25.07                    | 25.18                    |                  | 0.995   | 0.880*  | >0.10         | <b>0.0377</b> |
| hsa-miR-204-5p                | 29.68                    | 29.88                    | 30.31                    |                  | 0.810   | 0.575   | >0.10         | >0.10         |
| hsa-miR-205-5p                | 25.27                    | 26.62                    | 25.55                    |                  | 0.367*  | 0.734   | <b>0.0257</b> | >0.10         |
| hsa-miR-20a-3p                | 29.12                    | 28.85                    | 28.83                    |                  | 1.127   | 1.085   | >0.10         | >0.10         |
| hsa-miR-20a-5p                | 23.33                    | 23.26                    | 23.25                    |                  | 0.984   | 0.945   | >0.10         | >0.10         |
| hsa-miR-20b-3p <sup>5cX</sup> | 30.08                    | 29.69                    | 29.95                    |                  | 1.228   | 0.974   | >0.10         | >0.10         |
| hsa-miR-20b-5p <sup>5cX</sup> | 28.19                    | 27.50                    | 27.94                    |                  | 1.503   | 1.059   | >0.10         | >0.10         |
| hsa-miR-210-3p                | 27.96                    | 28.00                    | 27.58                    |                  | 0.907   | 1.154   | >0.10         | >0.10         |
| hsa-miR-2110                  | 30.83                    | 31.04                    | 30.47                    |                  | 0.803   | 1.135   | >0.10         | >0.10         |
| hsa-miR-212-3p                | 32.51                    | 32.15                    | 32.72                    |                  | 1.199   | 0.770   | >0.10         | >0.10         |
| hsa-miR-212-5p                | 35.93                    | 35.76                    | 35.71                    |                  | 1.054   | 0.919   | >0.10         | >0.10         |
| hsa-miR-21-3p                 | 33.43                    | 32.19                    | 32.69                    |                  | 2.202*  | 1.485   | <b>0.0372</b> | >0.10         |
| hsa-miR-215-5p                | 29.66                    | 30.21                    | 29.81                    |                  | 0.639   | 0.801   | 0.0579        | >0.10         |
| hsa-miR-21-5p                 | 21.09                    | 20.64                    | 20.86                    |                  | 1.270   | 1.047   | >0.10         | >0.10         |
| hsa-miR-217                   | 36.64                    | 35.61                    | 35.85                    |                  | 2.504   | 1.547   | >0.10         | >0.10         |
| hsa-miR-218-5p                | 31.89                    | 32.04                    | 31.48                    |                  | 0.836   | 1.175   | >0.10         | >0.10         |
| hsa-miR-219a-5p               | 31.98                    | 31.49                    | 31.72                    |                  | 1.308   | 1.067   | >0.10         | >0.10         |
| hsa-miR-221-3p                | 28.84                    | 30.30                    | 29.69                    |                  | 0.338   | 0.492   | >0.10         | >0.10         |
| hsa-miR-222-3p                | 26.18                    | 27.71                    | 26.82                    |                  | 0.323*  | 0.570   | <b>0.0296</b> | >0.10         |
| hsa-miR-223-3p                | 31.17                    | 29.89                    | 31.25                    |                  | 2.263   | 0.838   | >0.10         | >0.10         |
| hsa-miR-22-3p                 | 27.52                    | 26.77                    | 26.90                    |                  | 1.562   | 1.361   | >0.10         | >0.10         |
| hsa-miR-224-3p                | 33.96                    | 34.98                    | 36.27                    |                  | 0.436   | 0.202   | >0.10         | 0.0818        |
| hsa-miR-224-5p                | 35.31                    | 35.69                    | 36.03                    |                  | 0.680   | 0.477   | >0.10         | >0.10         |
| hsa-miR-22-5p                 | 29.60                    | 28.84                    | 28.90                    |                  | 1.581   | 1.445   | >0.10         | >0.10         |
| hsa-miR-23a-3p                | 23.90                    | 24.04                    | 24.02                    |                  | 0.847   | 0.823   | >0.10         | >0.10         |
| hsa-miR-23b-3p                | 23.56                    | 23.63                    | 23.50                    |                  | 0.888   | 0.928   | >0.10         | >0.10         |
| hsa-miR-23b-5p                | 35.46                    | 33.99                    | 34.71                    |                  | 2.590*  | 1.498   | <b>0.0284</b> | >0.10         |
| hsa-miR-24-1-5p               | 33.69                    | 33.18                    | 33.04                    |                  | 1.325   | 1.390   | >0.10         | >0.10         |
| hsa-miR-24-2-5p               | 32.74                    | 32.67                    | 32.72                    |                  | 0.976   | 0.900   | >0.10         | >0.10         |
| hsa-miR-24-3p                 | 23.67                    | 23.89                    | 23.61                    |                  | 0.805   | 0.929   | >0.10         | >0.10         |
| hsa-miR-25-3p                 | 25.83                    | 26.01                    | 25.59                    |                  | 0.824   | 1.054   | >0.10         | >0.10         |
| hsa-miR-25-5p                 | 33.68                    | 33.57                    | 33.66                    |                  | 1.012   | 0.904   | >0.10         | >0.10         |
| hsa-miR-26a-1-3p              | 33.96                    | 33.84                    | 33.54                    |                  | 1.017   | 1.197   | >0.10         | >0.10         |
| hsa-miR-26a-2-3p              | 36.20                    | 36.81                    | 36.07                    |                  | 0.679   | 0.981   | >0.10         | >0.10         |
| hsa-miR-26a-5p                | 23.23                    | 23.19                    | 23.18                    |                  | 0.958   | 0.919   | >0.10         | >0.10         |
| hsa-miR-26b-3p                | 32.01                    | 31.57                    | 31.50                    |                  | 1.258   | 1.261   | >0.10         | >0.10         |
| hsa-miR-26b-5p                | 24.94                    | 24.20                    | 24.31                    |                  | 1.560   | 1.374   | >0.10         | >0.10         |
| hsa-miR-27a-3p                | 27.70                    | 27.17                    | 27.37                    |                  | 1.346   | 1.119   | >0.10         | >0.10         |
| hsa-miR-27b-3p                | 24.82                    | 24.77                    | 24.68                    |                  | 0.964   | 0.975   | >0.10         | >0.10         |
| hsa-miR-27b-5p                | 33.11                    | 33.26                    | 32.94                    |                  | 0.836   | 1.000   | >0.10         | >0.10         |
| hsa-miR-28-3p                 | 26.70                    | 26.79                    | 26.67                    |                  | 0.876   | 0.912   | >0.10         | >0.10         |

Continued

Supplementary Table SIV *Continued*

| miRNA            | Average Cp <sub>Nz</sub> | Average Cp <sub>OA</sub> | Average Cp <sub>SA</sub> | miRNA expression |        |       | P-value       |        |
|------------------|--------------------------|--------------------------|--------------------------|------------------|--------|-------|---------------|--------|
|                  |                          |                          |                          | Nz               | OA     | SA    | OA-Nz         | SA-Nz  |
| hsa-miR-28-5p    | 26.33                    | 26.31                    | 26.17                    | 1                | 0.943  | 0.990 | >0.10         | >0.10  |
| hsa-miR-296-3p   | 35.52                    | 35.77                    | 36.13                    | 1                | 0.795  | 0.667 | >0.10         | >0.10  |
| hsa-miR-296-5p   | 34.74                    | 32.75                    | 33.48                    | 1                | 3.705* | 2.400 | <b>0.0177</b> | >0.10  |
| hsa-miR-29a-3p   | 26.48                    | 25.68                    | 25.94                    | 1                | 1.614* | 1.288 | <b>0.0103</b> | >0.10  |
| hsa-miR-29a-5p   | 28.35                    | 28.26                    | 28.32                    | 1                | 0.989  | 0.907 | >0.10         | >0.10  |
| hsa-miR-29b-2-5p | 28.90                    | 28.87                    | 28.63                    | 1                | 0.951  | 1.072 | >0.10         | >0.10  |
| hsa-miR-29b-3p   | 25.73                    | 25.03                    | 24.96                    | 1                | 1.517  | 1.516 | >0.10         | >0.10  |
| hsa-miR-29c-3p   | 25.29                    | 24.43                    | 24.62                    | 1                | 1.687* | 1.415 | <b>0.0468</b> | >0.10  |
| hsa-miR-29c-5p   | 30.81                    | 30.04                    | 30.08                    | 1                | 1.582  | 1.466 | 0.0759        | >0.10  |
| hsa-miR-301a-3p  | 30.31                    | 30.63                    | 30.23                    | 1                | 0.748  | 0.941 | >0.10         | >0.10  |
| hsa-miR-301b     | 33.65                    | 34.40                    | 33.68                    | 1                | 0.556  | 0.872 | >0.10         | >0.10  |
| hsa-miR-30a-3p   | 27.93                    | 27.83                    | 27.94                    | 1                | 1.003  | 0.887 | >0.10         | >0.10  |
| hsa-miR-30a-5p   | 26.08                    | 25.73                    | 26.27                    | 1                | 1.193  | 0.781 | >0.10         | >0.10  |
| hsa-miR-30b-3p   | 35.80                    | 34.66                    | 34.51                    | 1                | 2.050  | 2.174 | 0.0914        | >0.10  |
| hsa-miR-30b-5p   | 23.30                    | 23.31                    | 23.31                    | 1                | 0.929  | 0.886 | >0.10         | >0.10  |
| hsa-miR-30c-1-3p | 35.63                    | 35.69                    | 35.09                    | 1                | 0.895  | 1.290 | >0.10         | >0.10  |
| hsa-miR-30c-5p   | 23.93                    | 23.83                    | 23.88                    | 1                | 1.001  | 0.919 | >0.10         | 0.0630 |
| hsa-miR-30d-3p   | 30.36                    | 30.09                    | 30.21                    | 1                | 1.126  | 0.986 | >0.10         | >0.10  |
| hsa-miR-30d-5p   | 24.02                    | 23.97                    | 23.87                    | 1                | 0.969  | 0.985 | >0.10         | >0.10  |
| hsa-miR-30e-3p   | 26.73                    | 26.71                    | 26.56                    | 1                | 0.950  | 1.005 | >0.10         | >0.10  |
| hsa-miR-30e-5p   | 24.65                    | 24.72                    | 24.59                    | 1                | 0.889  | 0.930 | >0.10         | >0.10  |
| hsa-miR-31-3p    | 32.20                    | 34.10                    | 33.48                    | 1                | 0.250* | 0.367 | <b>0.0481</b> | >0.10  |
| hsa-miR-31-5p    | 28.68                    | 30.31                    | 29.38                    | 1                | 0.302* | 0.548 | <b>0.0387</b> | >0.10  |
| hsa-miR-320a     | 25.21                    | 25.43                    | 24.96                    | 1                | 0.800  | 1.056 | >0.10         | >0.10  |
| hsa-miR-320b     | 26.60                    | 26.88                    | 26.45                    | 1                | 0.765  | 0.985 | >0.10         | >0.10  |
| hsa-miR-320c     | 28.35                    | 28.28                    | 27.77                    | 1                | 0.982  | 1.331 | >0.10         | >0.10  |
| hsa-miR-320d     | 29.69                    | 30.22                    | 29.33                    | 1                | 0.778  | 1.140 | >0.10         | >0.10  |
| hsa-miR-323a-3p  | 34.64                    | 33.46                    | 34.91                    | 1                | 2.118  | 0.738 | >0.10         | >0.10  |
| hsa-miR-32-3p    | 34.03                    | 33.81                    | 33.41                    | 1                | 1.087  | 1.370 | >0.10         | >0.10  |
| hsa-miR-324-3p   | 27.77                    | 27.36                    | 27.39                    | 1                | 1.240  | 1.155 | >0.10         | >0.10  |
| hsa-miR-324-5p   | 27.27                    | 26.96                    | 26.80                    | 1                | 1.158  | 1.229 | >0.10         | >0.10  |
| hsa-miR-32-5p    | 28.59                    | 27.84                    | 28.21                    | 1                | 1.566  | 1.159 | >0.10         | >0.10  |
| hsa-miR-328-3p   | 29.90                    | 29.49                    | 29.51                    | 1                | 1.235  | 1.162 | >0.10         | >0.10  |
| hsa-miR-330-3p   | 32.73                    | 32.59                    | 32.44                    | 1                | 1.025  | 1.087 | >0.10         | >0.10  |
| hsa-miR-330-5p   | 35.10                    | 35.29                    | 33.79                    | 1                | 0.797  | 1.700 | >0.10         | >0.10  |
| hsa-miR-331-3p   | 27.63                    | 27.69                    | 27.66                    | 1                | 0.898  | 0.869 | >0.10         | >0.10  |
| hsa-miR-331-5p   | 34.97                    | 35.24                    | 35.25                    | 1                | 0.780  | 0.737 | >0.10         | >0.10  |
| hsa-miR-335-3p   | 34.12                    | 35.46                    | 34.59                    | 1                | 0.369  | 0.641 | 0.0529        | >0.10  |
| hsa-miR-335-5p   | 30.14                    | 30.44                    | 29.86                    | 1                | 0.756  | 1.081 | >0.10         | >0.10  |
| hsa-miR-338-3p   | 29.30                    | 28.74                    | 29.00                    | 1                | 1.373  | 1.093 | >0.10         | >0.10  |
| hsa-miR-338-5p   | 35.91                    | 36.48                    | 36.76                    | 1                | 0.653  | 0.454 | >0.10         | >0.10  |
| hsa-miR-339-3p   | 29.34                    | 29.20                    | 29.25                    | 1                | 1.028  | 0.949 | >0.10         | >0.10  |
| hsa-miR-339-5p   | 28.16                    | 27.90                    | 27.93                    | 1                | 1.118  | 1.042 | >0.10         | >0.10  |
| hsa-miR-33a-3p   | 30.87                    | 30.65                    | 30.64                    | 1                | 1.087  | 1.045 | >0.10         | >0.10  |
| hsa-miR-33a-5p   | 29.26                    | 27.83                    | 28.36                    | 1                | 2.528  | 1.663 | 0.0928        | >0.10  |
| hsa-miR-33b-3p   | 31.94                    | 31.87                    | 32.44                    | 1                | 0.976  | 0.628 | >0.10         | >0.10  |

*Continued*

Supplementary Table SIV *Continued*

| miRNA                         | Average Cp <sub>Nz</sub> | Average Cp <sub>OA</sub> | Average Cp <sub>SA</sub> | miRNA expression |         |         | P-value       |               |
|-------------------------------|--------------------------|--------------------------|--------------------------|------------------|---------|---------|---------------|---------------|
|                               |                          |                          |                          | Nz               | OA      | SA      | OA-Nz         | SA-Nz         |
| hsa-miR-33b-5p                | 35.06                    | 33.59                    | 34.20                    |                  | 2.583   | 1.613   | 0.0968        | >0.10         |
| hsa-miR-340-3p                | 32.34                    | 32.06                    | 31.64                    |                  | 1.131   | 1.440   | >0.10         | 0.0699        |
| hsa-miR-340-5p                | 30.47                    | 30.29                    | 30.34                    |                  | 0.960   | 0.893   | >0.10         | >0.10         |
| hsa-miR-342-3p                | 25.37                    | 25.65                    | 25.54                    |                  | 0.772   | 0.790   | >0.10         | >0.10         |
| hsa-miR-342-5p                | 33.01                    | 32.96                    | 33.15                    |                  | 0.840   | 0.809   | >0.10         | >0.10         |
| hsa-miR-345-5p                | 27.66                    | 27.79                    | 27.48                    |                  | 0.852   | 1.009   | >0.10         | >0.10         |
| hsa-miR-346                   | 35.04                    | 34.86                    | 36.03                    |                  | 1.284   | 0.454   | >0.10         | >0.10         |
| hsa-miR-34a-3p                | 31.32                    | 31.05                    | 30.39                    |                  | 1.131   | 1.704   | >0.10         | >0.10         |
| hsa-miR-34a-5p                | 28.28                    | 27.70                    | 26.59                    |                  | 1.393   | 2.862   | >0.10         | 0.0665        |
| hsa-miR-34b-3p                | 32.35                    | 35.66                    | 35.28                    |                  | 0.124   | 0.132   | >0.10         | >0.10         |
| hsa-miR-34b-5p                | 31.44                    | 35.21                    | 33.86                    |                  | 0.007*  | 0.167*  | <b>0.0272</b> | <b>0.0163</b> |
| hsa-miR-34c-3p                | 33.83                    | 36.96                    | 35.06                    |                  | 0.093*  | 0.382   | <b>0.0087</b> | >0.10         |
| hsa-miR-34c-5p                | 30.18                    | 34.17                    | 33.78                    |                  | 0.059** | 0.073*  | <b>0.0005</b> | <b>0.0244</b> |
| hsa-miR-361-3p                | 30.59                    | 29.69                    | 29.77                    |                  | 1.741*  | 1.575   | <b>0.0473</b> | 0.0720        |
| hsa-miR-361-5p                | 25.45                    | 25.37                    | 25.20                    |                  | 0.986   | 1.053   | >0.10         | >0.10         |
| hsa-miR-362-3p <sup>4cX</sup> | 29.95                    | 30.02                    | 30.09                    |                  | 0.891   | 0.808   | >0.10         | >0.10         |
| hsa-miR-362-5p <sup>4cX</sup> | 32.07                    | 32.47                    | 32.26                    |                  | 0.708   | 0.781   | >0.10         | >0.10         |
| hsa-miR-363-3p <sup>5cX</sup> | 24.42                    | 23.76                    | 23.94                    |                  | 1.474** | 1.241** | <b>0.0002</b> | <b>0.0043</b> |
| hsa-miR-363-5p <sup>5cX</sup> | 34.82                    | 33.94                    | 33.65                    |                  | 1.725   | 2.004   | >0.10         | >0.10         |
| hsa-miR-365a-3p               | 28.61                    | 27.76                    | 27.96                    |                  | 1.689*  | 1.394*  | <b>0.0350</b> | <b>0.0171</b> |
| hsa-miR-365b-5p               | 35.70                    | 35.26                    | 34.07                    |                  | 1.267   | 2.760   | >0.10         | >0.10         |
| hsa-miR-370-3p                | 36.90                    | 34.64                    | 35.83                    |                  | 3.795   | 1.594   | >0.10         | >0.10         |
| hsa-miR-374a-5p               | 27.93                    | 27.48                    | 27.70                    |                  | 1.280   | 1.044   | >0.10         | >0.10         |
| hsa-miR-374b-3p               | 33.70                    | 32.65                    | 33.03                    |                  | 1.933   | 1.414   | >0.10         | >0.10         |
| hsa-miR-374b-5p               | 26.44                    | 26.31                    | 26.30                    |                  | 1.018   | 0.980   | >0.10         | >0.10         |
| hsa-miR-375                   | 20.85                    | 21.15                    | 20.63                    |                  | 0.758   | 1.030   | >0.10         | >0.10         |
| hsa-miR-376a-3p               | 32.77                    | 31.84                    | 32.78                    |                  | 1.781   | 0.884   | >0.10         | >0.10         |
| hsa-miR-376b-3p               | 34.83                    | 33.93                    | 35.20                    |                  | 1.544   | 0.702   | >0.10         | >0.10         |
| hsa-miR-376c-3p               | 32.35                    | 31.31                    | 32.54                    |                  | 1.923   | 0.782   | >0.10         | >0.10         |
| hsa-miR-378a-5p               | 36.44                    | 35.74                    | 36.12                    |                  | 1.538   | 1.266   | >0.10         | >0.10         |
| hsa-miR-379-5p                | 34.12                    | 32.96                    | 34.64                    |                  | 2.071   | 0.618   | >0.10         | >0.10         |
| hsa-miR-381-3p                | 35.54                    | 35.24                    | 35.67                    |                  | 1.197   | 0.837   | >0.10         | >0.10         |
| hsa-miR-382-5p                | 33.25                    | 32.75                    | 33.79                    |                  | 1.318   | 0.609   | >0.10         | >0.10         |
| hsa-miR-383-5p                | 36.03                    | <b>40.00</b>             | <b>40.00</b>             |                  | 0.059** | 0.057** | <b>0.0031</b> | <b>0.0010</b> |
| hsa-miR-409-3p                | 33.61                    | 32.84                    | 32.48                    |                  | 1.601   | 1.947   | >0.10         | >0.10         |
| hsa-miR-410-3p                | 35.92                    | 34.35                    | 34.96                    |                  | 2.801   | 1.753   | >0.10         | >0.10         |
| hsa-miR-411-5p                | 33.96                    | 33.65                    | 34.07                    |                  | 1.156   | 0.826   | >0.10         | >0.10         |
| hsa-miR-421                   | 29.66                    | 30.02                    | 30.04                    |                  | 0.725   | 0.685   | >0.10         | >0.10         |
| hsa-miR-423-3p                | 26.27                    | 25.88                    | 25.58                    |                  | 1.223   | 1.429   | >0.10         | 0.0673        |
| hsa-miR-423-5p                | 27.59                    | 27.31                    | 26.85                    |                  | 1.129   | 1.485*  | >0.10         | <b>0.0165</b> |
| hsa-miR-424-5p                | 30.61                    | 32.75                    | 31.68                    |                  | 0.212*  | 0.424   | <b>0.0392</b> | >0.10         |
| hsa-miR-425-3p                | 29.84                    | 29.71                    | 29.66                    |                  | 1.017   | 1.006   | >0.10         | >0.10         |
| hsa-miR-425-5p                | 27.73                    | 27.60                    | 27.48                    |                  | 1.016   | 1.051   | >0.10         | >0.10         |
| hsa-miR-429                   | 26.61                    | 26.33                    | 26.34                    |                  | 1.132   | 1.075   | >0.10         | >0.10         |
| hsa-miR-432-5p                | 35.78                    | 34.95                    | 35.54                    |                  | 1.664   | 1.050   | >0.10         | >0.10         |
| hsa-miR-449a                  | 30.27                    | 32.25                    | 32.38                    |                  | 0.237*  | 0.205** | <b>0.0193</b> | <b>0.0020</b> |

*Continued*

Supplementary Table SIV Continued

| miRNA                            | Average Cp <sub>Nz</sub> | Average Cp <sub>OA</sub> | Average Cp <sub>SA</sub> | miRNA expression |         |         | P-value       |               |
|----------------------------------|--------------------------|--------------------------|--------------------------|------------------|---------|---------|---------------|---------------|
|                                  |                          |                          |                          | Nz               | OA      | SA      | OA-Nz         | SA-Nz         |
| hsa-miR-449b-3p                  | 35.71                    | 36.16                    | 35.75                    |                  | 0.594   | 0.852   | >0.10         | >0.10         |
| hsa-miR-450a-5p                  | 34.36                    | 36.21                    | 35.52                    |                  | 0.339   | 0.399   | >0.10         | >0.10         |
| hsa-miR-451a                     | 35.25                    | 34.04                    | 34.88                    |                  | 2.184   | 1.158   | >0.10         | >0.10         |
| hsa-miR-452-5p                   | 32.94                    | 36.83                    | 35.53                    |                  | 0.063*  | 0.148*  | <b>0.0164</b> | <b>0.0355</b> |
| hsa-miR-454-3p                   | 29.58                    | 29.65                    | 29.45                    |                  | 0.891   | 0.974   | >0.10         | >0.10         |
| hsa-miR-455-3p                   | 30.52                    | 31.88                    | 31.54                    |                  | 0.364*  | 0.439   | <b>0.0097</b> | 0.0750        |
| hsa-miR-455-5p                   | 33.47                    | 34.76                    | 35.05                    |                  | 0.382*  | 0.297*  | <b>0.0419</b> | <b>0.0442</b> |
| hsa-miR-484                      | 28.42                    | 28.00                    | 28.03                    |                  | 1.253   | 1.162   | >0.10         | >0.10         |
| hsa-miR-485-3p                   | 35.68                    | 35.49                    | 35.16                    |                  | 1.295   | 1.287   | >0.10         | >0.10         |
| hsa-miR-486-5p                   | 33.60                    | 32.18                    | 32.79                    |                  | 2.512   | 1.568   | >0.10         | >0.10         |
| hsa-miR-487b-3p                  | 34.15                    | 32.96                    | 33.78                    |                  | 2.133   | 1.154   | >0.10         | >0.10         |
| hsa-miR-491-3p                   | 35.64                    | 34.65                    | 35.27                    |                  | 1.279   | 1.149   | >0.10         | >0.10         |
| hsa-miR-491-5p                   | 29.82                    | 29.70                    | 29.44                    |                  | 1.009   | 1.155   | >0.10         | >0.10         |
| hsa-miR-493-3p                   | 36.58                    | 34.18                    | 34.20                    |                  | 4.482   | 4.252   | >0.10         | >0.10         |
| hsa-miR-493-5p                   | 36.58                    | 35.44                    | 35.71                    |                  | 2.073   | 1.622   | 0.0765        | >0.10         |
| hsa-miR-495-3p                   | 34.50                    | 32.90                    | 34.31                    |                  | 2.841   | 1.020   | >0.10         | >0.10         |
| hsa-miR-497-5p                   | 28.10                    | 27.31                    | 27.45                    |                  | 1.612   | 1.394   | >0.10         | >0.10         |
| hsa-miR-499a-5p                  | 34.44                    | 35.88                    | 35.93                    |                  | 0.343*  | 0.315*  | <b>0.0382</b> | <b>0.0310</b> |
| hsa-miR-500a-5p <sup>4cX</sup>   | 30.54                    | 31.36                    | 31.05                    |                  | 0.530   | 0.624   | >0.10         | >0.10         |
| hsa-miR-501-3p <sup>4cX</sup>    | 31.72                    | 32.13                    | 32.04                    |                  | 0.703   | 0.716   | >0.10         | >0.10         |
| hsa-miR-501-5p <sup>4cX</sup>    | 31.08                    | 32.31                    | 31.95                    |                  | 0.397   | 0.485   | 0.0677        | >0.10         |
| hsa-miR-502-3p <sup>4cX</sup>    | 30.76                    | 31.10                    | 30.95                    |                  | 0.739   | 0.779   | >0.10         | >0.10         |
| hsa-miR-504-5p                   | 34.06                    | 33.00                    | 33.55                    |                  | 1.957   | 1.442   | >0.10         | >0.10         |
| hsa-miR-505-3p                   | 30.15                    | 30.27                    | 30.02                    |                  | 0.860   | 0.977   | >0.10         | >0.10         |
| hsa-miR-505-5p                   | 34.38                    | 34.63                    | 33.79                    |                  | 0.785   | 1.331   | >0.10         | >0.10         |
| hsa-miR-506-3p <sup>1cX</sup>    | 35.77                    | <b>40.00</b>             | <b>40.00</b>             |                  | 0.050** | 0.047** | <b>0.0014</b> | <b>0.0003</b> |
| hsa-miR-508-5p <sup>1cX</sup>    | 35.14                    | <b>40.00</b>             | <b>40.00</b>             |                  | 0.032** | 0.031** | <b>0.0029</b> | <b>0.0045</b> |
| hsa-miR-509-3-5p <sup>1cX</sup>  | 31.96                    | <b>40.00</b>             | 37.73                    |                  | 0.004** | 0.016*  | <b>0.0000</b> | <b>0.0206</b> |
| hsa-miR-509-3p <sup>1cX</sup>    | 32.81                    | 34.30                    | 34.39                    |                  | 0.318   | 0.299   | 0.0866        | >0.10         |
| hsa-miR-510-5p <sup>2cX</sup>    | 33.14                    | <b>40.00</b>             | <b>40.00</b>             |                  | 0.008** | 0.008** | <b>0.0002</b> | <b>0.0000</b> |
| hsa-miR-513a-3p <sup>1cX</sup>   | 35.30                    | <b>40.00</b>             | <b>40.00</b>             |                  | 0.036*  | 0.034*  | <b>0.0232</b> | <b>0.0257</b> |
| hsa-miR-513b-5p <sup>3cX</sup>   | 35.82                    | <b>39.08</b>             | <b>39.79</b>             |                  | 0.097   | 0.057   | 0.0629        | 0.0559        |
| hsa-miR-513c-5p <sup>3cX</sup>   | 33.42                    | <b>40.00</b>             | <b>40.00</b>             |                  | 0.010** | 0.009** | <b>0.0015</b> | <b>0.0025</b> |
| hsa-miR-514a-3p <sup>2cX</sup>   | 29.69                    | <b>40.00</b>             | <b>40.00</b>             |                  | 0.001** | 0.001** | <b>0.0001</b> | <b>0.0002</b> |
| hsa-miR-517a-3p <sup>1c19</sup>  | 33.11                    | 35.09                    | 34.97                    |                  | 0.163   | 0.192   | >0.10         | >0.10         |
| hsa-miR-517c-3p <sup>2c19</sup>  | 33.39                    | 37.14                    | 36.67                    |                  | 0.069** | 0.091*  | <b>0.0056</b> | <b>0.0285</b> |
| hsa-miR-518e-3p <sup>1c19</sup>  | 34.75                    | <b>39.76</b>             | <b>38.22</b>             |                  | 0.029** | 0.080*  | <b>0.0000</b> | <b>0.0331</b> |
| hsa-miR-519d-3p <sup>1c19</sup>  | 35.00                    | 36.69                    | 36.83                    |                  | 0.202   | 0.255   | >0.10         | >0.10         |
| hsa-miR-520c-3p <sup>1c19</sup>  | 37.10                    | <b>40.00</b>             | <b>40.00</b>             |                  | 0.125   | 0.119   | 0.0866        | 0.0867        |
| hsa-miR-520h <sup>2c19</sup>     | 35.29                    | <b>40.00</b>             | <b>39.33</b>             |                  | 0.036** | 0.054*  | <b>0.0008</b> | <b>0.0369</b> |
| hsa-miR-521 <sup>1c19,2c19</sup> | 35.57                    | <b>40.00</b>             | <b>40.00</b>             |                  | 0.042*  | 0.040*  | <b>0.0201</b> | <b>0.0317</b> |
| hsa-miR-532-3p <sup>4cX</sup>    | 27.90                    | 28.05                    | 27.84                    |                  | 0.839   | 0.930   | >0.10         | >0.10         |
| hsa-miR-532-5p <sup>4cX</sup>    | 28.04                    | 28.44                    | 28.13                    |                  | 0.708   | 0.839   | >0.10         | >0.10         |
| hsa-miR-539-5p                   | 34.29                    | 33.18                    | 34.56                    |                  | 2.006   | 0.735   | >0.10         | >0.10         |
| hsa-miR-543                      | 35.25                    | 33.30                    | 33.93                    |                  | 3.602   | 2.223   | 0.0570        | >0.10         |
| hsa-miR-545-3p                   | 32.79                    | 32.56                    | 32.32                    |                  | 1.095   | 1.231   | >0.10         | >0.10         |

Continued

Supplementary Table SIV *Continued*

| miRNA                         | Average Cp <sub>Nz</sub> | Average Cp <sub>OA</sub> | Average Cp <sub>SA</sub> | miRNA expression |         |         | P-value       |               |
|-------------------------------|--------------------------|--------------------------|--------------------------|------------------|---------|---------|---------------|---------------|
|                               |                          |                          |                          | Nz               | OA      | SA      | OA-Nz         | SA-Nz         |
| hsa-miR-548b-3p               | 36.55                    | 36.74                    | 36.07                    | 1                | 0.589   | 1.289   | >0.10         | >0.10         |
| hsa-miR-548j-5p               | 35.25                    | 36.05                    | 36.26                    | 1                | 0.706   | 0.436   | >0.10         | >0.10         |
| hsa-miR-548k                  | 35.08                    | 35.07                    | 34.33                    | 1                | 0.945   | 1.505   | >0.10         | >0.10         |
| hsa-miR-548l                  | 36.40                    | 36.65                    | 36.31                    | 1                | 1.028   | 1.068   | >0.10         | >0.10         |
| hsa-miR-550a-3p               | 35.75                    | 35.72                    | 35.48                    | 1                | 0.957   | 1.076   | >0.10         | >0.10         |
| hsa-miR-550a-5p               | <b>40.00</b>             | <b>38.60</b>             | 36.59                    | 1                | 2.465   | 9.455*  | >0.10         | <b>0.0094</b> |
| hsa-miR-551b-3p               | 33.44                    | 36.18                    | 35.29                    | 1                | 0.139** | 0.246   | <b>0.0042</b> | 0.0764        |
| hsa-miR-570-3p                | 33.46                    | 33.70                    | 33.19                    | 1                | 0.797   | 1.087   | >0.10         | >0.10         |
| hsa-miR-574-3p                | 24.42                    | 24.64                    | 24.27                    | 1                | 0.803   | 0.988   | >0.10         | >0.10         |
| hsa-miR-576-3p                | 35.09                    | 34.82                    | 35.27                    | 1                | 0.778   | 0.892   | >0.10         | >0.10         |
| hsa-miR-576-5p                | 34.93                    | 34.31                    | 34.00                    | 1                | 1.434   | 1.697   | >0.10         | >0.10         |
| hsa-miR-582-3p                | 32.15                    | 32.15                    | 32.01                    | 1                | 0.936   | 1.108   | >0.10         | >0.10         |
| hsa-miR-582-5p                | 27.62                    | 27.70                    | 27.60                    | 1                | 0.883   | 0.903   | >0.10         | >0.10         |
| hsa-miR-589-3p                | 33.05                    | 33.15                    | 33.02                    | 1                | 0.872   | 0.911   | >0.10         | >0.10         |
| hsa-miR-589-5p                | 34.38                    | 33.51                    | 33.59                    | 1                | 1.698   | 1.531   | >0.10         | >0.10         |
| hsa-miR-590-3p                | 31.33                    | 31.06                    | 30.88                    | 1                | 1.119   | 1.212   | >0.10         | >0.10         |
| hsa-miR-590-5p                | 27.59                    | 27.66                    | 27.47                    | 1                | 0.887   | 0.970   | >0.10         | >0.10         |
| hsa-miR-592                   | 35.37                    | 34.81                    | 34.93                    | 1                | 1.370   | 1.208   | >0.10         | >0.10         |
| hsa-miR-598-3p                | 29.03                    | 29.22                    | 28.68                    | 1                | 0.817   | 1.127   | >0.10         | >0.10         |
| hsa-miR-616-3p                | 35.47                    | 36.06                    | 36.31                    | 1                | 0.427   | 0.491   | >0.10         | >0.10         |
| hsa-miR-616-5p                | 35.14                    | 35.04                    | 35.65                    | 1                | 1.001   | 0.625   | >0.10         | >0.10         |
| hsa-miR-618                   | 36.35                    | 35.84                    | 35.20                    | 1                | 1.613   | 1.562   | >0.10         | >0.10         |
| hsa-miR-625-3p                | 34.95                    | 34.64                    | 35.16                    | 1                | 1.160   | 0.769   | >0.10         | >0.10         |
| hsa-miR-627-5p                | 33.89                    | 33.47                    | 34.04                    | 1                | 1.244   | 0.798   | >0.10         | >0.10         |
| hsa-miR-628-3p                | 32.30                    | 32.78                    | 32.78                    | 1                | 0.667   | 0.636   | >0.10         | >0.10         |
| hsa-miR-628-5p                | 33.28                    | 33.80                    | 33.60                    | 1                | 0.650   | 0.713   | >0.10         | >0.10         |
| hsa-miR-629-3p                | 33.73                    | 33.07                    | 33.38                    | 1                | 1.469   | 1.136   | >0.10         | >0.10         |
| hsa-miR-629-5p                | 30.75                    | 30.99                    | 30.60                    | 1                | 0.789   | 0.989   | >0.10         | >0.10         |
| hsa-miR-632                   | 35.99                    | 34.85                    | 35.54                    | 1                | 2.074   | 1.211   | 0.0923        | >0.10         |
| hsa-miR-641                   | 37.58                    | 36.35                    | 37.36                    | 1                | 2.189   | 1.037   | >0.10         | >0.10         |
| hsa-miR-642a-5p               | 36.22                    | 35.99                    | 35.43                    | 1                | 1.094   | 1.541   | >0.10         | >0.10         |
| hsa-miR-651-5p                | 33.88                    | 33.41                    | 33.70                    | 1                | 1.295   | 1.012   | >0.10         | >0.10         |
| hsa-miR-652-3p                | 28.36                    | 27.79                    | 27.73                    | 1                | 1.382   | 1.374   | >0.10         | >0.10         |
| hsa-miR-660-5p <sup>4cX</sup> | 27.23                    | 27.50                    | 27.25                    | 1                | 0.775   | 0.875   | >0.10         | >0.10         |
| hsa-miR-663a                  | 30.95                    | 30.90                    | 30.84                    | 1                | 0.963   | 0.960   | >0.10         | >0.10         |
| hsa-miR-664a-3p               | 29.92                    | 29.91                    | 30.01                    | 1                | 0.937   | 0.837   | >0.10         | >0.10         |
| hsa-miR-671-3p                | 32.06                    | 32.29                    | 32.06                    | 1                | 0.795   | 0.891   | 0.0785        | >0.10         |
| hsa-miR-671-5p                | 33.68                    | 33.41                    | 34.00                    | 1                | 1.130   | 0.715   | >0.10         | >0.10         |
| hsa-miR-708-5p                | 33.84                    | 35.32                    | 33.17                    | 1                | 0.332   | 1.409   | >0.10         | >0.10         |
| hsa-miR-7-1-3p                | 28.72                    | 28.90                    | 28.71                    | 1                | 0.824   | 0.898   | >0.10         | >0.10         |
| hsa-miR-744-3p                | 32.83                    | 32.98                    | 32.47                    | 1                | 0.843   | 1.141   | >0.10         | >0.10         |
| hsa-miR-744-5p                | 29.88                    | 29.71                    | 29.59                    | 1                | 1.048   | 1.088   | >0.10         | >0.10         |
| hsa-miR-7-5p                  | 31.11                    | 30.85                    | 30.43                    | 1                | 1.127   | 1.436   | >0.10         | >0.10         |
| hsa-miR-766-3p                | 30.72                    | 30.88                    | 30.15                    | 1                | 0.833   | 1.321   | >0.10         | >0.10         |
| hsa-miR-769-5p                | 30.76                    | 30.45                    | 30.45                    | 1                | 1.154   | 1.106   | >0.10         | >0.10         |
| hsa-miR-873-5p                | 36.50                    | <b>40.00</b>             | <b>40.00</b>             | 1                | 0.082** | 0.079** | <b>0.0026</b> | <b>0.0037</b> |

*Continued*



**Supplementary Table SIV** *Continued*

| miRNA                           | Average Cp <sub>Nz</sub> | Average Cp <sub>OA</sub> | Average Cp <sub>SA</sub> | miRNA expression |         |        | P-value       |               |
|---------------------------------|--------------------------|--------------------------|--------------------------|------------------|---------|--------|---------------|---------------|
|                                 |                          |                          |                          | Nz               | OA      | SA     | OA-Nz         | SA-Nz         |
| hsa-miR-877-3p                  | 36.07                    | 35.96                    | 36.62                    |                  | 0.859   | 0.596  | >0.10         | >0.10         |
| hsa-miR-877-5p                  | 32.02                    | 32.15                    | 32.09                    |                  | 0.744   | 0.847  | >0.10         | >0.10         |
| hsa-miR-885-3p                  | 34.13                    | 34.19                    | 34.43                    |                  | 0.831   | 0.708  | >0.10         | >0.10         |
| hsa-miR-887-3p                  | 35.66                    | 35.50                    | 34.37                    |                  | 0.719   | 2.149  | >0.10         | >0.10         |
| hsa-miR-888-5p <sup>6cX</sup>   | 25.93                    | 29.18                    | 27.11                    |                  | 0.098*  | 0.391  | <b>0.0324</b> | >0.10         |
| hsa-miR-890 <sup>6cX</sup>      | 26.85                    | 30.22                    | 28.14                    |                  | 0.090*  | 0.363  | <b>0.0235</b> | 0.0590        |
| hsa-miR-891a-5p                 | 24.00                    | 27.26                    | 24.99                    |                  | 0.097*  | 0.448  | <b>0.0266</b> | >0.10         |
| hsa-miR-891b <sup>6cX</sup>     | 28.56                    | 32.03                    | 29.53                    |                  | 0.084*  | 0.455  | <b>0.0387</b> | >0.10         |
| hsa-miR-892a <sup>6cX</sup>     | 29.42                    | 32.54                    | 30.13                    |                  | 0.107*  | 0.544  | <b>0.0148</b> | >0.10         |
| hsa-miR-92a-1-5p                | 34.24                    | 33.57                    | 33.28                    |                  | 1.486   | 1.734  | >0.10         | 0.0570        |
| hsa-miR-92a-2-5p <sup>5cX</sup> | 32.45                    | 31.54                    | 32.02                    |                  | 1.762   | 1.202  | >0.10         | >0.10         |
| hsa-miR-92a-3p <sup>5cX</sup>   | 24.06                    | 23.70                    | 23.79                    |                  | 1.194   | 1.074  | >0.10         | >0.10         |
| hsa-miR-92b-3p                  | 34.30                    | 33.58                    | 34.19                    |                  | 1.533   | 0.959  | >0.10         | >0.10         |
| hsa-miR-93-3p                   | 29.70                    | 29.46                    | 29.38                    |                  | 1.095   | 1.107  | >0.10         | >0.10         |
| hsa-miR-934                     | 34.82                    | 34.41                    | 35.63                    |                  | 1.510   | 0.514  | >0.10         | 0.0857        |
| hsa-miR-935                     | <b>39.07</b>             | 37.75                    | 37.12                    |                  | 2.317   | 3.436  | >0.10         | >0.10         |
| hsa-miR-93-5p                   | 24.61                    | 24.71                    | 24.30                    |                  | 0.872   | 1.102  | >0.10         | >0.10         |
| hsa-miR-9-3p                    | 35.76                    | <b>40.00</b>             | <b>40.00</b>             |                  | 0.049** | 0.047* | <b>0.0047</b> | <b>0.0067</b> |
| hsa-miR-940                     | 29.65                    | 28.23                    | 29.40                    |                  | 2.180   | 1.058  | >0.10         | >0.10         |
| hsa-miR-941                     | 30.70                    | 30.94                    | 30.11                    |                  | 0.786   | 1.333  | >0.10         | >0.10         |
| hsa-miR-942-5p                  | 36.01                    | 33.93                    | 36.48                    |                  | 2.748   | 0.654  | >0.10         | >0.10         |
| hsa-miR-95-3p                   | 30.80                    | 31.26                    | 30.15                    |                  | 0.678*  | 1.398  | <b>0.0489</b> | >0.10         |
| hsa-miR-9-5p                    | 33.45                    | 34.89                    | 34.89                    |                  | 0.343   | 0.328* | 0.0675        | <b>0.0199</b> |
| hsa-miR-96-5p                   | 28.31                    | 27.40                    | 27.38                    |                  | 1.750   | 1.694* | 0.0519        | <b>0.0463</b> |
| hsa-miR-98-5p                   | 29.92                    | 29.71                    | 29.16                    |                  | 1.076   | 1.500  | >0.10         | 0.0973        |
| hsa-miR-99a-3p                  | 28.54                    | 28.25                    | 28.17                    |                  | 1.141   | 1.150  | >0.10         | >0.10         |
| hsa-miR-99a-5p                  | 21.16                    | 21.25                    | 21.08                    |                  | 0.874   | 0.937  | >0.10         | >0.10         |
| hsa-miR-99b-3p                  | 31.54                    | 31.68                    | 31.56                    |                  | 0.847   | 0.875  | >0.10         | >0.10         |
| hsa-miR-99b-5p                  | 25.81                    | 25.83                    | 25.76                    |                  | 0.921   | 0.918  | >0.10         | >0.10         |

Statistically increased miRNA expression levels are depicted in green; statistically decreased miRNA expression levels are depicted in red, when compared with controls. Cp values >38 are depicted in bold.

\*P < 0.05; \*\*P < 0.005. Statistically significant P-values are depicted in bold (unpaired two-tailed Student's t test).
